# Supplementary material for: Helicobacter pylori attachment-blocking antibodies protect against duodenal ulcer disease
Source: PubMed Central journal article supplement — bioRxiv. 2023 May 24:2023.05.24.542096. Preprint. [Version 1] doi: 10.1101/2023.05.24.542096 (PMC10245814; doi:10.1101/2023.05.24.542096), 2023-05-24
Supplement: NIHPP2023.05.24.542096v1-supplement-1.pdf [file NIHPP2023.05.24.542096v1-supplement-1.pdf]

1  
2 **Supplemental figures**  
3

## 1 Supplemental figures.

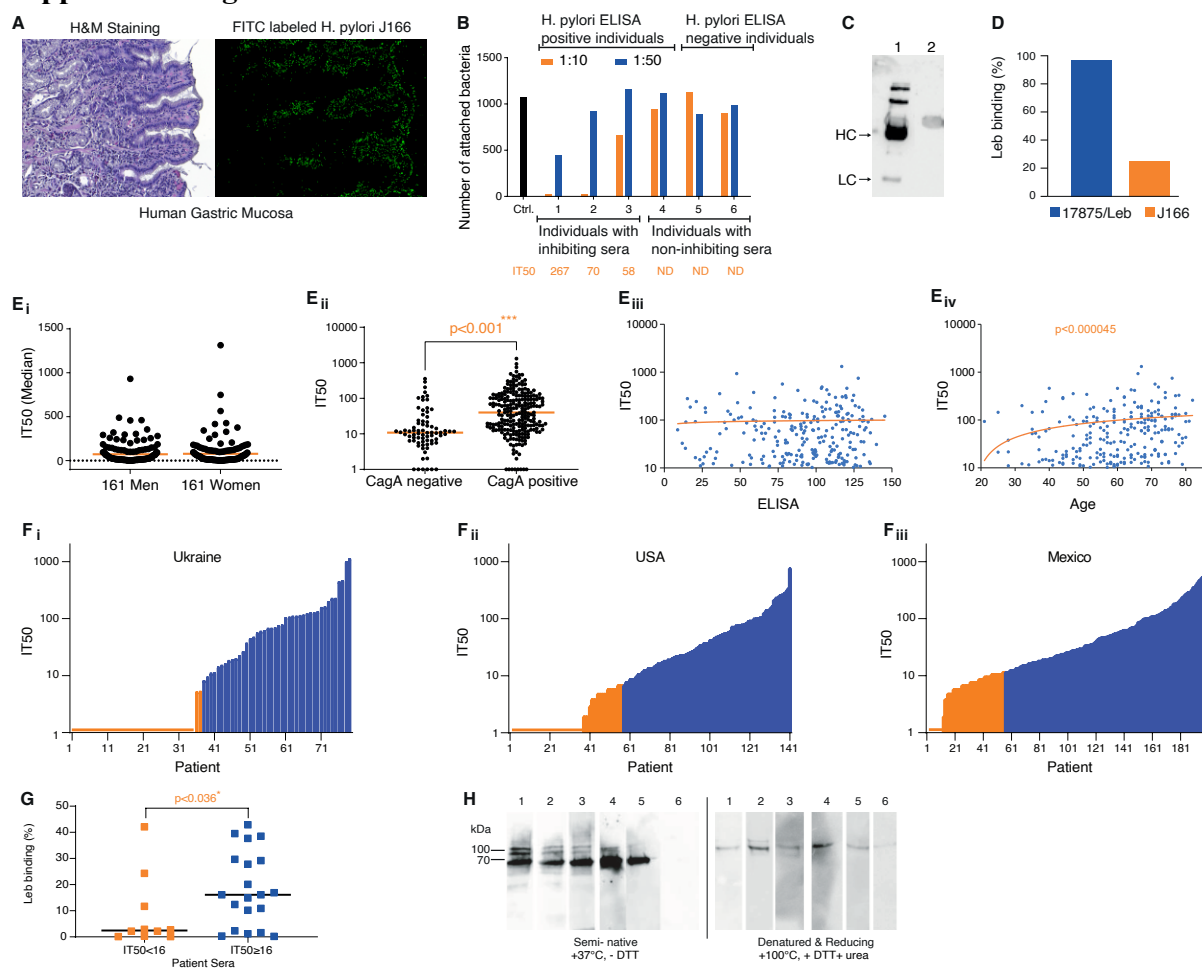

2

3

### 4 **Figure S1. High global prevalence of serum inhibition of Leb binding**

5 (A) H&E-stained adjacent sections of human gastric mucosa from Figure 1A, (Aii) and *in*

6 *vitro* attachment by *H. pylori* J166 bacterial cells labeled with FITC-green fluorescence.

7 (B) Quantification by ImageJ of attached J166 bacteria treated with 1:10 and 1:50 dilutions

8 of individual serum samples from Figure 1A. Individuals 1-4 were ELISA positive for *H.*

9 *pylori* infection, whereas individuals 5 and 6 were ELISA negative. Individuals 1-3

10 demonstrated IT50s of 267, 70, and 58, in contrast to individuals 4-6 with non-detectable

11 (ND) titers (Figure 1B).

12 (C) Immunoblot of the SDS-PAGE-separated serum proteins from individual 1 (from

13 Figure 1A) detected with anti-human Ab. The heavy chain (HC) and light chain (LC), i.e.,

14 the IgG components, were fully removed by Protein G affinity desorption (sera before (1)

15 and after (2) IgG desorption).

16 (D) *H. pylori* J166 with only 25% “Hot-Leb binding” is a low-affinity Leb-binding strain,

17 compared to 17875/Leb, with >95% “Hot-Leb binding” which is a high-affinity Leb binding

18 strain. High and low-affinity Leb-binding *H. pylori* strains have been identified (Figure

19 S2B). The 25% Hot-Leb binding by strain J166 corresponds to ~50-fold lower affinity

1 according to Scatchard tests, which is a radio immuno-assay (RIA) for affinity testing  
2 based on binding of Leb under equilibrium conditions <sup>42</sup>.  
3 **(Ei)** Among the 322 Kalixanda Swedish *H. pylori* carriers (95% of whom were gastric  
4 healthy), the 161 men with median age 59 years and 161 women with median age of 61  
5 years did not exhibit any difference in median IT50 (**Table S1B**).  
6 **(Eii)** The CagA status by ELISA among 317 out of 322 Kalixanda individuals (5 individuals  
7 were not tested for CagA) exhibited strong correlation with IT50, with a median IT50 = 11  
8 for CagA-negative individuals and a median IT50 = 40 for CagA-positive individuals. \*\*\* p  
9 < 0.001.  
10 **(Eiii)** The general immune response against *H. pylori* (ELISA) and IT50 among the 322  
11 Kalixanda individuals showed no correlation.  
12 **(Eiv)** A rank correlation test showed that the IT50s increased with age among the 322  
13 Kalixanda individuals,  $r = 0.28$ ,  $p \leq 0.000045$ . This was most similar to a regular correlation  
14 test,  $r = 0.18$ ,  $p \leq 0.001$ .  
15 **(Fi)** The IT50s of 79 ELISA-positive individuals from Sumy, Ukraine, tested with strain  
16 17875/Leb with a median IT50 = 69 and a mean IT50 = 125, where 44 (56%) sera samples  
17 were positive for Leb inhibition by strain J166 (**Table S1C**).  
18 **(Fii)** The IT50s of 141 ELISA-positive individuals from the US tested with strain 17875/Leb  
19 with a median IT50 = 39 and a mean IT50 = 79, where 83 sera samples (59%) were  
20 positive for Leb inhibition by strain J166 (**Table S1D**).  
21 **(Fiii)** The IT50s of 200 ELISA-positive individuals from Mexico City, Mexico, tested with  
22 strain 17875/Leb with a median IT50 = 50 and mean IT50 = 115, where 146 sera samples  
23 (72%) were positive for Leb inhibition by strain J166 (**Table S1E**).  
24 **(G)** The 30 Mexican sera and corresponding strains (**Table S2B**) were tested for  
25 correlation between IT50s and the Leb binding property. Low IT50 (<16) sera are in  
26 orange and high IT50 sera ( $\geq 16$ ) are in blue with medians indicated (Wilcoxon  $p = 0.036$ ).  
27 **(H)** Immunoblot detection by serum samples from (1) the Karolinska University Hospital  
28 (Sweden) (**Figure 1I**), (2) Ukraine, (3) the US, (4) Mexico, (5) the Kalixanda series  
29 (Sweden), and (6) the ELISA-negative individual 5 from **Figure 1A**. BabA protein was  
30 purified from strain 17875/Leb and separated by semi-native SDS-PAGE (samples were  
31 kept at 37°C for 10 min without reducing agent) or under full denaturing and reducing  
32 conditions (samples heated to 100°C in reducing SDS sample buffer with 8M urea and 10  
33 mM DTT). BabA binding by sera antibodies was detected using HRP-conjugated anti-  
34 human antibody.  
35

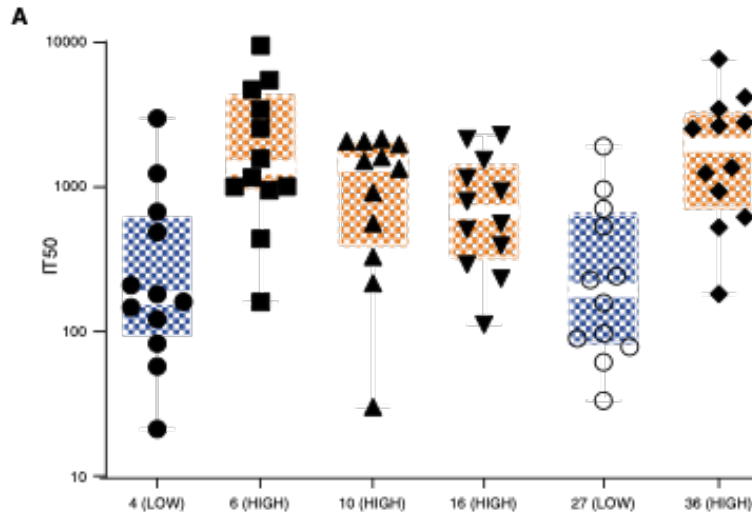

**B**

| Strain         |            |                   | ABO Blood Group Antigen Binding Properties, % |                 |                | Binding Preference <sup>a</sup> |            |
|----------------|------------|-------------------|-----------------------------------------------|-----------------|----------------|---------------------------------|------------|
| Continent      | Country    | ID                | Leb, Hot                                      | Leb, Cocktail   | ALeb, Cocktail |                                 |            |
| Reference      |            |                   | 17875/Leb                                     | 97 <sup>b</sup> | 32             | 29                              | Generalist |
|                |            |                   | J166                                          | 25 <sup>b</sup> | 12             | 16                              | Generalist |
| Europe         | Sweden     | Sw44 <sup>c</sup> | 42                                            | 47              | 33             | Generalist                      |            |
|                |            | Sw103             | 93                                            | 24              | 14             | Generalist                      |            |
|                | Spain      | S864              | 83                                            | 23              | 16             | Generalist                      |            |
| Asia           | India      | I9                | 64                                            | 15              | 9              | Generalist                      |            |
|                | China      | Ch1               | 86                                            | 44              | 36             | Generalist                      |            |
|                | Japan      | J533              | 88                                            | 27              | 26             | Generalist                      |            |
| North Americas | USA/Alaska | A714              | 89                                            | 23              | 21             | Generalist                      |            |
|                |            | A723              | 63                                            | 11              | 0.3            | Specialist                      |            |
| South Americas | Peru       | P330              | 88                                            | 28              | 0.3            | Specialist                      |            |
|                |            | P436              | 86                                            | 49              | 12             | Specialist                      |            |

**C**

|           | Key-position | Key-coil     | Key-loop  |             |                       | Entrance-loop           |
|-----------|--------------|--------------|-----------|-------------|-----------------------|-------------------------|
| 17875/Leb | TCSGEGNDNC   | SKKATGV      | SDQNGG    | TKTQTIDGK   | TVTTTSSKV             | VV -- DSQAKGNTTRVSYTE   |
| J166      | TCSGKGNMNC   | EQATGI       | NRQNGG    | STTIOTIDGK  | TVRTTISLKV            | VV -- DSTASGNTSHVSYTE   |
| SW44      | TCSERNDNC    | SPQVTGV      | SNQNGG    | TKTEIQTIDGK | SVTTTSSKV             | VV -- DSKASGNRLGVSYTE   |
| SW103     | TCSGEGNMC    | FQDFTGI      | NDQSGG    | TKTTTQIDGK  | SVTTTSSKV             | VV -- DSRAPGNTSRVSYTE   |
| S864      | TCSGGNMC     | SEKATGV      | DKQNGG    | TKTINQIDGK  | TVTTTSSKV             | VV -- DSRATEGNTQHVSYTE  |
| I9        | TCSGKGNMNC   | DVLKDNRRGG   | TKETQIDGK | SVTTTSSKV   | VV -- DSTASGNTQHVSYTE |                         |
| Ch1       | TCSGEGNMC    | RKVTGV       | EQNGG     | SKTETQIDGK  | QVSTTSSKV             | VV -- DSRALGNTRGVSYTE   |
| J533      | TCSGEGNMC    | SPGTVGV      | EHQNGG    | KTKETIDGK   | TVSTTIISKV            | VV -- DSNALGNTRRVSYTE   |
| A723      | TCSGEGNMC    | FIKLADGKLEQR | GGSETT    | TTQIDGK     | QVTTTSSQV             | VV -- DHNAQGNTLGSYTE    |
| A723      | TCSGEGNDNC   | TIKLADGEDLE  | RNGGSE    | TTTQIDGK    | QVVE -- VTS           | GVLVLYGQEYNGKWTGASYTE   |
| P330      | TCSGEGNTNC   | DPFLFGIKGN   | KRNGG     | TVTKTQIDGK  | QVSTTSSKV             | VV -- DSNASGNTSRVSYTE   |
| P436      | TCSGGNTNC    | DPFLFGIGDGR  | NGG       | SVTKTQIDGK  | QVNTTSSKV             | VV -- QP -- -- PHSAAYTE |

CL2 (under Key-coil and Key-loop)  
Entrance-loop (under TVTTTSSKV -- DS...)

Key-position, Key-coil, Key-loop, Entrance-loop labels are placed above their respective columns.

1  
2

1 **Figure S2. The broadly blocking serum Abs**  
2 (A) A box-plot presentation of the IT50 titers for the 12 strains in **Figure 2A** showing the  
3 relatively higher variation in IT50 titers for the two lower-inhibitory sera (LOW in blue,  
4 individuals 4 and 27) compared to the four sera with Higher inhibitory titers (HIGH in  
5 orange, individuals 6, 10, 16, and 36). In the log-scale presentation, the IT50 titers  
6 demonstrate increased spans between the quartiles for the LOW serum samples (Ansari-  
7 Bradley  $p = 0.07$ , i.e., close to significant and significant by removal of one outlier and  
8 between the “highest” from the LOW sera and the “lowest” from the HIGH sera (Ansari-  
9 Bradley  $p = 0.029$ ). The results suggest that the LOW sera displayed a higher level of  
10 discrimination for different strains compared to the HIGH sera that efficiently blocked the  
11 Leb binding of the majority of *H. pylori* strains.  
12 (B) Binding properties and binding preferences of *H. pylori* strains tested for inhibition by  
13 human sera (**Figure 2A**) and by ABbA (**Figure 4A**). <sup>a</sup>The Indigenous South American  
14 specialist isolates bind to Leb much better than to ALeb (from 2.5-fold to ~100-fold), i.e.,  
15 there is a Specialist preference for binding to blood group O antigen. In comparison, the  
16 common Generalist binding preference is defined as the Leb/ALeb-ratio interval from 1:1  
17 to 1:2.5 <sup>11</sup>. <sup>b</sup>The Hot Leb binding is from **Figure S1D**. <sup>c</sup>The ABO/Leb binding preference  
18 of *H. pylori* Sw44 is described in <sup>11</sup>.  
19 (C) Alignment of the central part of the BabA CBD of the *H. pylori* isolates from **Figure**  
20 **2A**. The strains were chosen with respect to differences in Leb-binding affinity, binding  
21 preference (ABO-Generalists vs. O-Specialists), and BabA phylogeny, illustrated in (B)  
22 <sup>11,14</sup>. The stars indicate the locations of the conserved Leb-binding DSS triad residues <sup>13</sup>.  
23 However, exceptions do exist, and the DSS residues in the BabA Entrance loop that are  
24 critical for binding to ABO/Leb can be modified by a change of charge or hydrophobic  
25 substitutions or by deletions, e.g., in the Specialist strains that only bind to the blood group  
26 O antigen, which is a common adaptation in binding preference among Indigenous  
27 American/Latin American strains such as A723 and P436 <sup>11,13</sup>.  
28

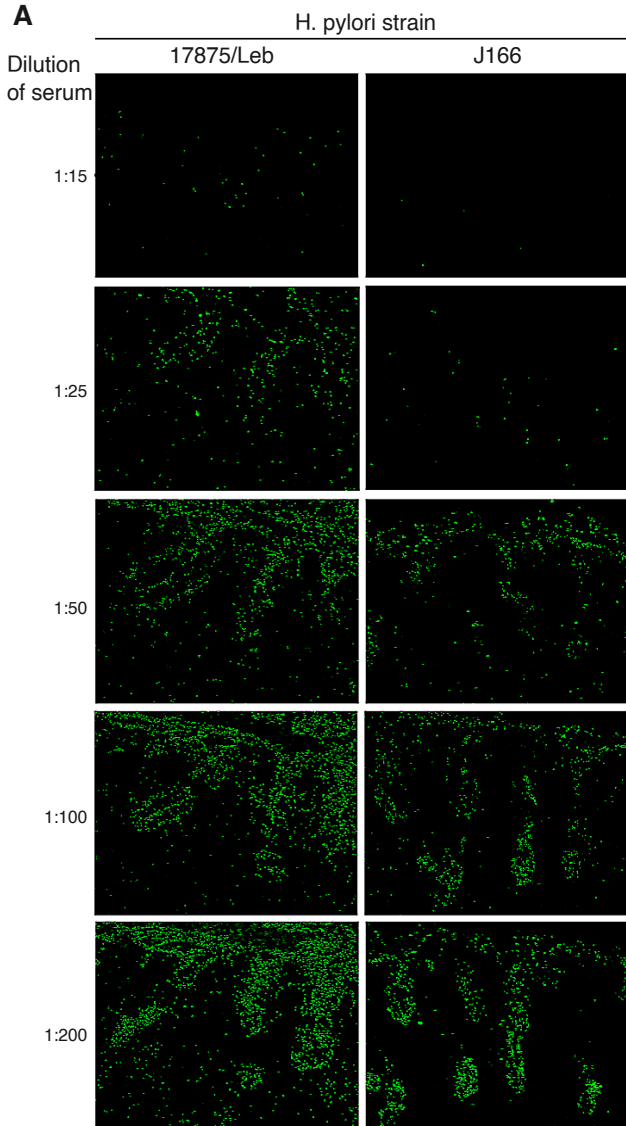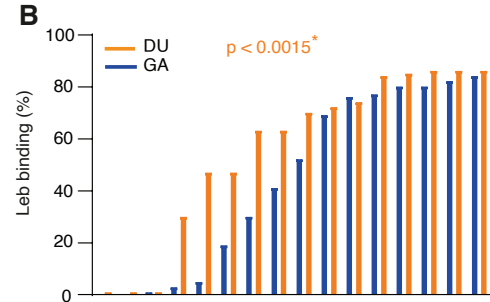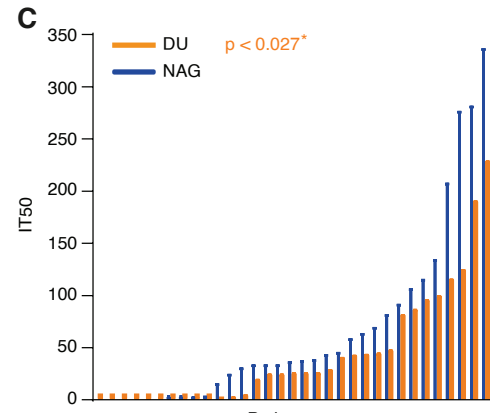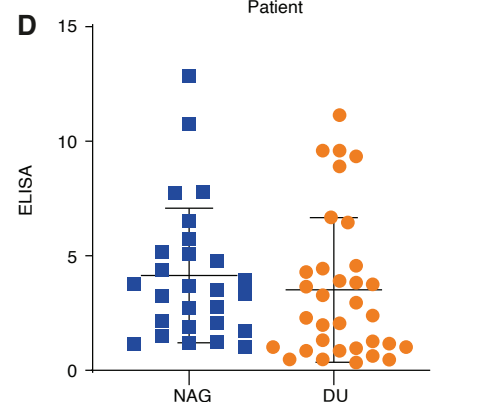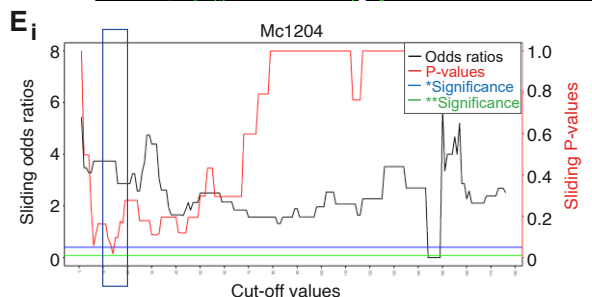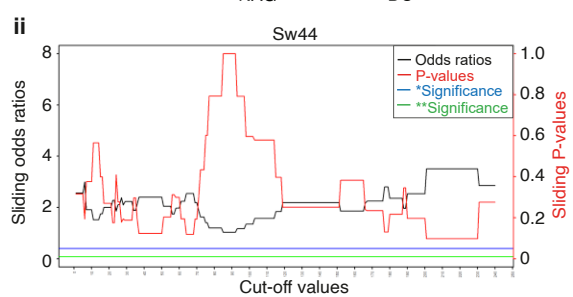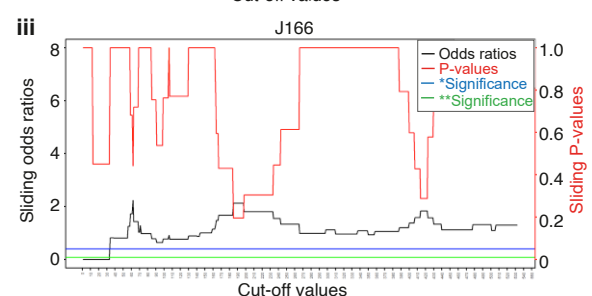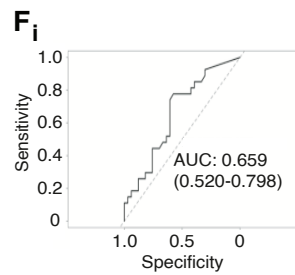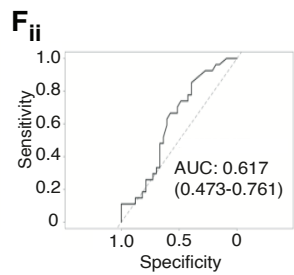

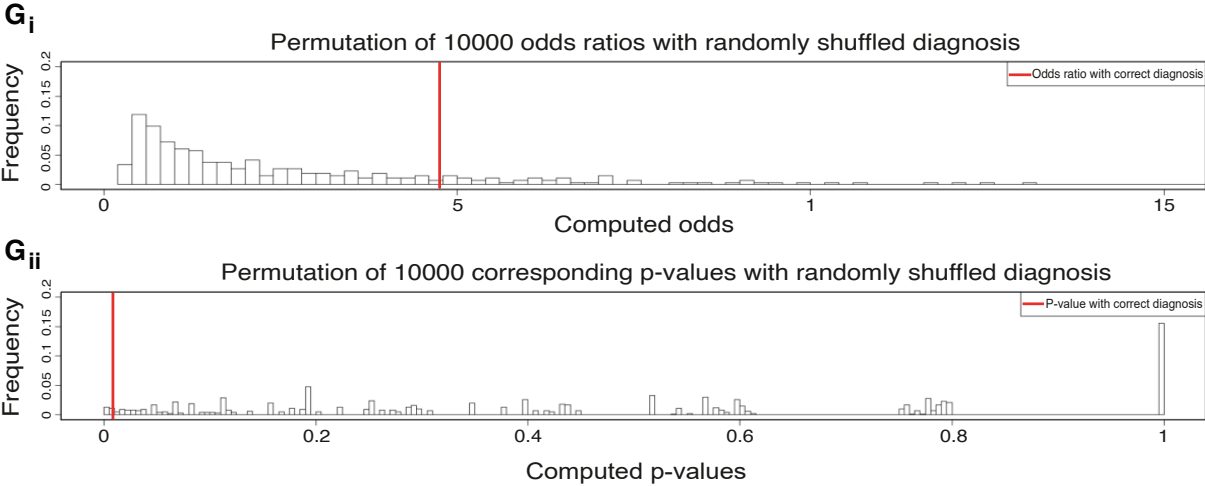

1 **Figure S3. Broadly blocking serum Abs protect against overt gastric disease**  
2 **(A)** Strains 17875/Leb and J166 were tested for blocking of *in vitro* binding to human  
3 gastric mucosa (**Figure 2B**) by a dilution series of sera from individual 1 (from **Figures**  
4 **1A** and **1B**). Attached bacterial cells were quantified by ImageJ.  
5 **(B)** A series of 32 Mexican isolates from patients with GA or DU (16 isolates for both) were  
6 tested for Leb binding strength with 1 ng of <sup>125</sup>I-labeled Leb-conjugate, i.e., a limiting  
7 concentration, defined as “Hot-Leb”. The DU isolates demonstrated generally higher  
8 binding strength compared to GA isolates (Wilcoxon signed-rank test,  $p = 0.0015$ ) (**Table**  
9 **S2B**).  
10 **(C)** The 79 serum samples from NAG and DU patients demonstrated generally higher  
11 IT50 for patients with NAG ( $p < 0.027$ ) (**Table S3**).  
12 **(D)** The 79 Mexican serum samples from patients with NAG or DU did not show significant  
13 differences in *H. pylori* ELISA,  $p < 0.4$ , i.e., the two patient groups exhibited similar general  
14 immune responses against chronic *H. pylori* infection (**Table S3**).  
15 **(Ei)** Sliding window for strain Mc1204; critical IT50 = 15 and  $p < 0.0189^*$  (indicated by the  
16 box) (**Table S3**).  
17 **(Eii-iii)** Sliding windows for strains Sw44 (ii) and J166 (iii), i.e., strains that are less  
18 discriminative for high vs. low-inhibition titers and thus do not provide the critical IT50  
19 values with significant ORs (**Table S3**). Our approach using high vs. low-affinity binding  
20 strains is conceptually similar to tests with different mAbs for discrimination between  
21 sensitivity and specificity in epitope recognition. The high-affinity strains 17875/Leb  
22 (**Figure 3C**) and Mc2014 (**Figure S3Ei**) discriminate between high vs. low IT50 in contrast  
23 to the low-affinity binding strains J166 and Sw44 (**Figure S2B**), which do not produce  
24 significant ORs (**ii** and **iii**). However, the low-affinity binding strain J166 identified all IT50-  
25 positive serum samples with low IT50 vs. the true IT50-negative sera samples (**Table S3**).  
26 **(Fi)** The ROC diagram AUC 0.659 for strain 17875/Leb shows that the critical IT50 value  
27 that provides the highest significance is 29.5, i.e., the Youden index using the Area Under  
28 the Curve (AUC) where sensitivity and specificity are maximal. The described approach  
29 for finding optimal cut-offs using the OR as the discrimination measure can be seen as  
30 complementing a more common approach, namely that of using the Youden index while  
31 showing the overall classification performance across all possible cut-offs using an ROC  
32 curve and associated AUC. The optimal cut-offs identified using this approach are very  
33 similar, and we can thus view the “OR approach” as a way of illustrating the classification  
34 performance across the range of possible cut-offs. This complements the AUC, which  
35 gives a measure of overall classification performance. What we see using the OR  
36 approach is that the best classification performance (high ORs) is achieved within a  
37 narrow range of IT50 values around 30, i.e., where an optimal cut-off is located. This,  
38 together with the AUC value provided in the ROC, indicates that there is indeed useful  
39 information in the IT50 values. The ROC analyses were performed using the *pROC*  
40 package in R<sup>62</sup>.  
41 **(Fii)** The ROC diagram AUC was 0.617 for strain Mc1204, and the critical IT50 value was  
42 15.5.  
43 **(G)** To verify the OR approach in an unbiased manner, we performed permutation tests  
44 where, in each iteration, we randomly permuted the outcome labels NAG/DU and then  
45 searched for an optimal Rf IT50 and its associated OR and its corresponding significance  
46 ( $p$ -value). We performed 10,000 iterations in each of these two permutation tests, and the  
47 *F*-test showed that the number of ORs (i.e., classification performance) that exceeded



1 OR 4.75 (red bar, from **Figures S3B** and **3C**) were less than 2% of the permutation test  
2 iterations. In addition, a **Gii**-test showed that the ORs with high corresponding significance  
3 ( $p$ -values) constituted non-random results ( $p = 0.027$  and  $p = 0.0197$ , respectively).  
4

**A**

ABbA VH sequence

0 → QVQLVQSGGGIGQPGGSLRLACEAS**GFTFNLFEM**AWVRQAPGQSLEVISY**IGSSGSTTRY** → 60  
 61 → ADSVKGRFIVSRDNDKESMFLQLNSLRVDDTATYFC**ARLNGWAGSGLDHW**GQGTLVAVSS → 120

ABbA VL sequence

0 → DIQMTQSPSSLSASVGRVTTTCRAS**QSISSY**LNWYQQKPGKAPKLLIYA**ASSLQ**SGVPS → 60  
 61 → RFGSGSGTDFTLTISSLPEDFATYYC**QQSYSTLWTF**GGQTKVEIK → 107

CDR1 CDR2 CDR3

**B<sub>i</sub>**

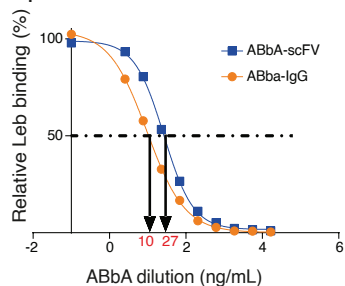

**B<sub>ii</sub>**

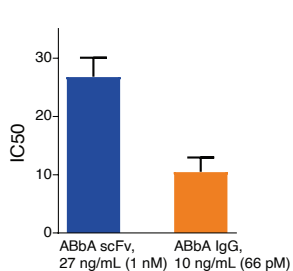

**C**

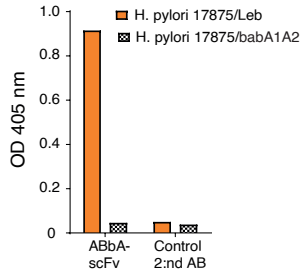

**D<sub>i</sub>**

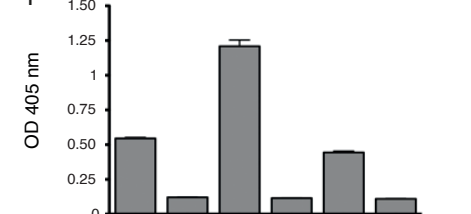

**D<sub>ii</sub>**

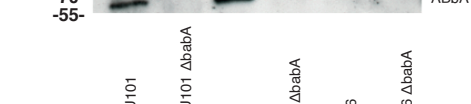

**D<sub>iii</sub>**

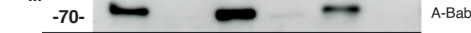

**D<sub>iv</sub>**

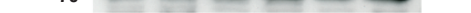

**G**

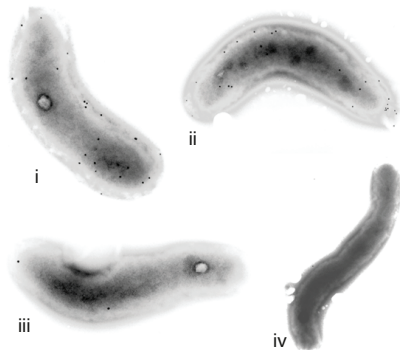

**E<sub>i</sub>**

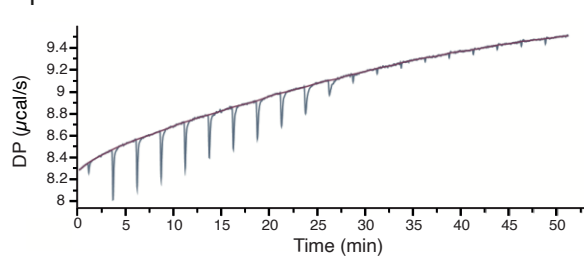

**E<sub>ii</sub>**

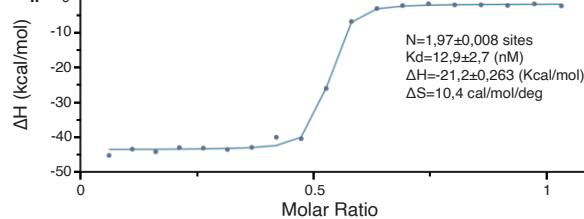

**F**

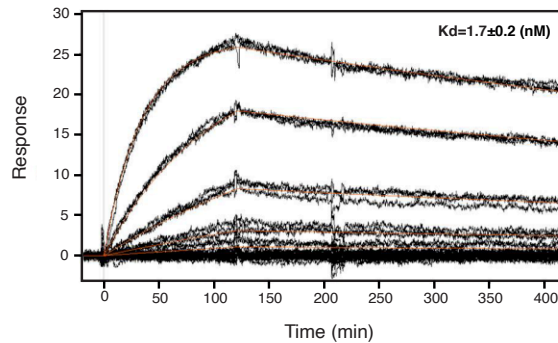

1 **Figure S4. Cloning and identification of ABbA, the broadly blocking mAb**  
2 **(A)** Amino acid sequences of the ABbA VH and VL. The ABbA-VH region was generated  
3 by recombination of the germline gene IgHV3-48\*3 with the D segment of IgHD2-15\*01  
4 and the J segment of IgHJ4\*03. The high number of mutations in comparison to the  
5 germline gene indicates intense affinity maturation. The ABbA-VL chain was derived from  
6 the VL germline gene IgGKV1D-39\*01 by recombination with the J segment of IgKJ1\*01.  
7 Interestingly, the ABbA-VL chain was nearly identical to its most closely related germline  
8 gene.  
9 **(Bi and Bii) Binding strength** of ABbA(1)-scFv (27 kDa) vs. ABbA-IgG (ABbA) (150 kDa)  
10 by strain 17875/Leb with a 16-fold difference in IC50 (the concentration of antibody that  
11 inhibits *H. pylori*-Leb binding by 50%) of 27 ng/mL (1 nM) and 10 ng/mL (66 pM),  
12 respectively.  
13 **(C) Specificity of ABbA binding.** ABbA(1)-scFv binds to *H. pylori* 17875/Leb but not to  
14 its isogenic 17875*babA1A2*-minus strain. ELISA wells coated with the two *H. pylori* strains  
15 were incubated with ABbA(1)-scFv. Binding was detected using an anti-myc mAb and  
16 HRP-conjugated anti-mouse Ab, and the control was secondary Ab only.  
17 **(D) Detailed specificity in ABbA binding.** To test for cross reactivity with the non-Leb-  
18 binding paralog BabB protein (with unknown function), three strains – USU101  
19 ([https://www.ncbi.nlm.nih.gov/nuccore/NZ\\_CP032818.1](https://www.ncbi.nlm.nih.gov/nuccore/NZ_CP032818.1)) and J166 from central/southern  
20 Europe<sup>22</sup> and J99 of African phylogeny<sup>40</sup> (**Figure 2B**) – and their *babA*-minus mutants –  
21 were analyzed. Two spontaneous *babA*-minus mutants, USU101 $\Delta$ *babA* and J166 $\Delta$ *babA*,  
22 isolated after passage from Rhesus macaques<sup>44,63</sup>, and a J99 $\Delta$ *babA* genetic deletion  
23 mutant<sup>41</sup> were compared with their cognate BabA-positive parent strains. *(i)* ELISA wells  
24 coated with the three *H. pylori* strains and the corresponding *babA*-minus mutants were  
25 incubated with ABbA-IgG. Binding was detected using an HRP-conjugated anti-human  
26 antibody. *(ii)* Immuno-blot detection of BabA by the strains USU101, J99, and J166.  
27 ABbA-IgG recognizes and binds BabA but does not recognize any bands/proteins in the  
28 BabA-negative strains. The lower affinity of J166 for ABbA binding is reflected in the  
29 binding of ABbA-IgG to BabA on the bacterial surface in the ELISA, but not to semi-  
30 denatured BabA on immunoblots. The ELISA was repeated three times, and each bar  
31 represents the mean of three values with the standard error. *(iii)* BabA expression was  
32 verified in an immunoblot with BabA-specific rabbit serum under denaturing conditions,  
33 where BabA was expressed in the original strains but not in the corresponding isogenic  
34 BabA mutants. *(iv)* BabB expression was verified in an immunoblot with BabB-specific  
35 rabbit serum under denaturing conditions, where all tested strains expressed BabB. The  
36 BabA protein was detected with VITE rabbit antibody<sup>14</sup>, and BabB was detected by VIRA  
37 rabbit antibody diluted 1:6000 and secondary HRP-goat (anti-rabbit) antibody diluted  
38 1:1000 (DakoCytomation, Denmark A/S).  
39 **(E) Affinity of ABbA-IgG.** *(i)* The ABbA-IgG binding affinity to recombinant soluble BabA  
40 (527 aa) devoid of the membrane-spanning hydrophobic beta-barrel domain was  
41 measured using isothermal titration calorimetry (ITC). *(ii)* Five separate ITC tests  
42 demonstrated an affinity of  $10.2 \pm 1.5$  nM with one representative experiment of  $K_d = 12.9$   
43 nM shown in the figure.  
44 **(F)** ABbA-IgG was immobilized on a chip and tested by Biacore Surface Plasmon  
45 Resonance (SPR) for binding to soluble BabA. Three separate tests demonstrated a  $K_d$   
46 =  $1.7 \pm 0.2$  nM. Most likely, the functional binding strength of ABbA-IgG will be log-folds

1 increased by the avidity effects gained in binding to BabA multimers on the *H. pylori*  
2 bacterial surfaces <sup>14</sup>.  
3 **(G)** Immuno-electron microscopy demonstrated specific BabA immune staining of *H.*  
4 *pylori* by ABbA. Bacterial cells with *H. pylori* 17875/Leb (**i**, **ii**) were incubated with ABbA,  
5 and bound IgG was visualized with 10 nm gold-labeled protein A. The 17875*babA*-minus  
6 mutant was used as a negative binding control (**iii**), and the anti-E2 HCV envelope IgG1  
7 was used as a negative antibody control (**iv**). The 17875*babA* mutant displayed only non-  
8 specific background binding similar to the isotype control antibody.  
9

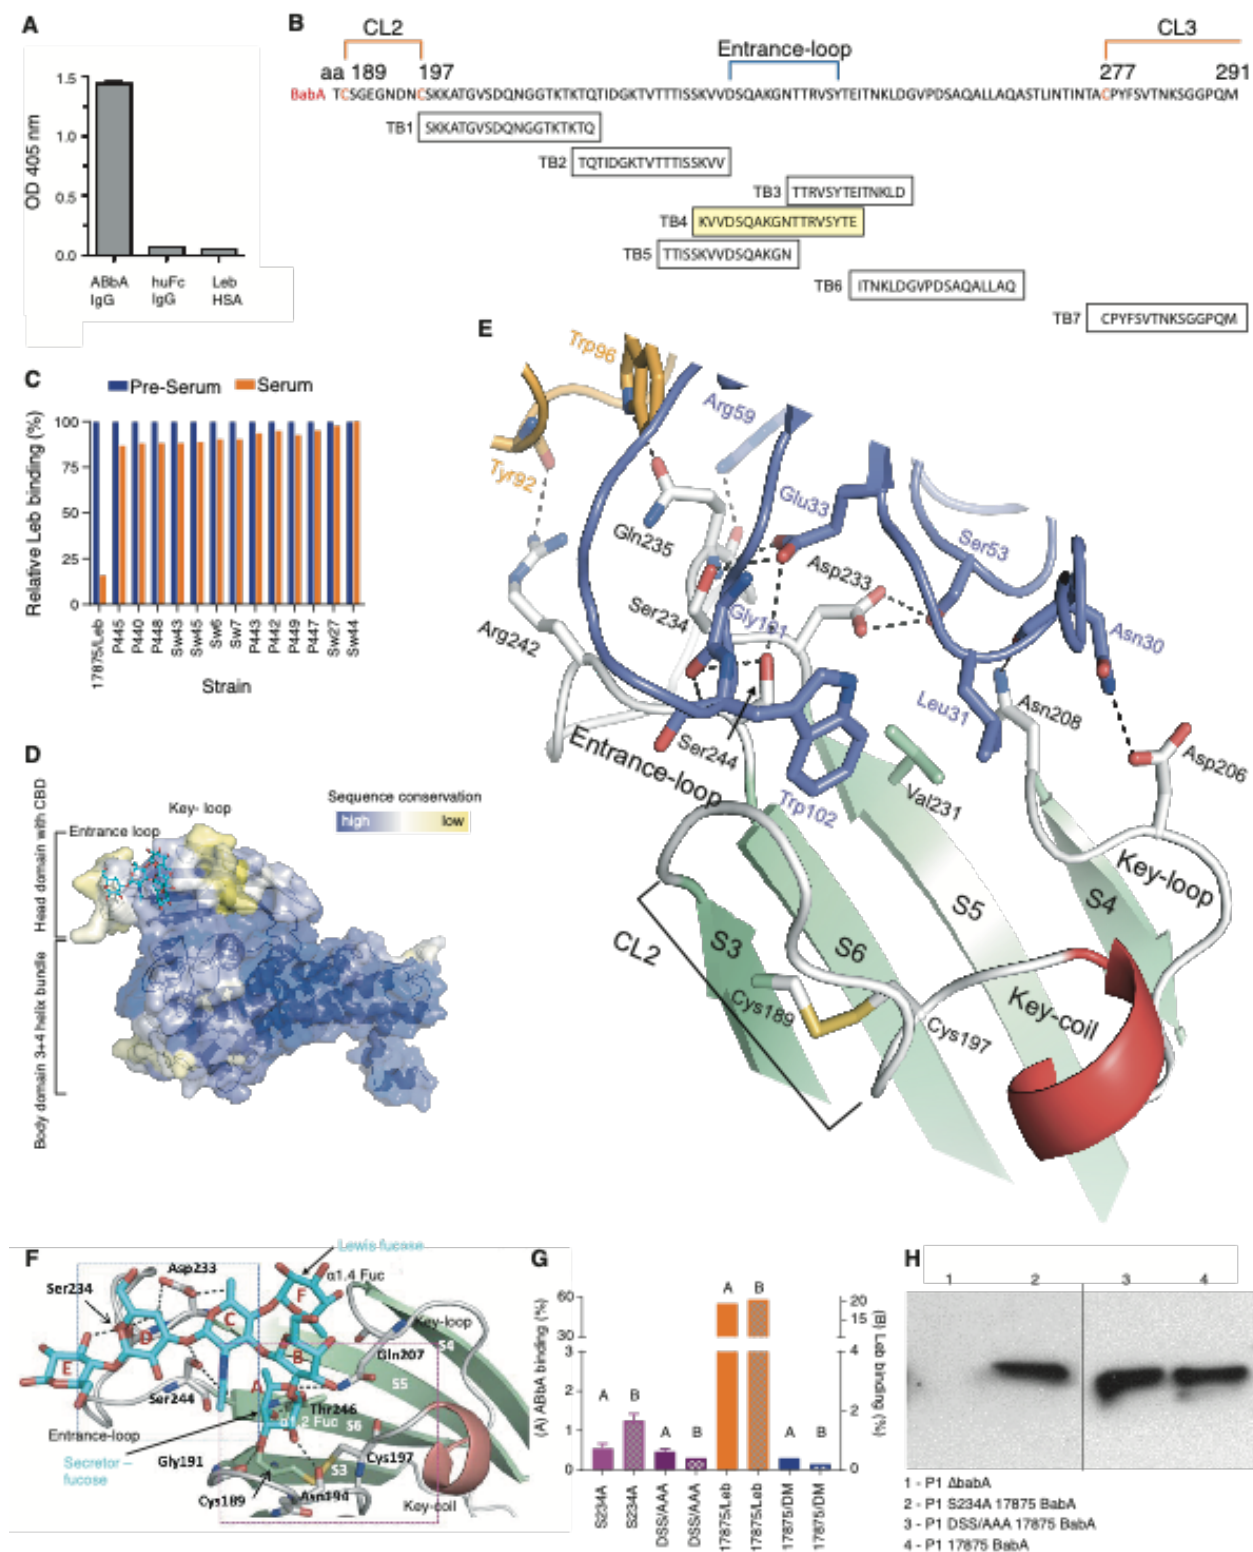

1 **Figure S5. Identification of the structural binding epitope in BabA for the broadly**  
2 **blocking ABbA**

3 (A) The 260 aa BabA<sub>76-335</sub> polypeptide selected from the phage-display shotgun library  
4 was recombinantly expressed with its three disulfide loops. Binding was assessed by  
5 ELISA with ABbA-IgG and human Fc (IgG1) fusion protein (as the negative control) and  
6 Leb (as the receptor). The 260 aa BabA fragment comprises an adequate epitope for  
7 ABbA binding but does not provide sufficient structural stability and support for Leb  
8 binding. The 260 aa BabA fragment was identified as reviewed in <sup>64</sup>.

9 (B) Alignment of the seven synthetic peptides of the CBD domain from aa197 to aa291,  
10 where peptides TB2, TB3, TB5, and TB6 partially overlap peptide TB4.

11 (C) Inhibition of Leb binding by the rabbit-sera TB4 of a series of *H. pylori* strains from  
12 Sweden (Sw) and Peru (P) and strain 17875/Leb. The TB4 serum, which was derived  
13 from the TB4 peptide of strain 17875/Leb, only efficiently inhibited Leb-binding by strain  
14 17875/Leb and did not significantly inhibit Leb-binding of strains from geographically local  
15 Sweden or distant Peru.

16 (D) The BabA adhesin exhibits extensive polymorphism with multiple amino acid  
17 substitutions (indicated in yellow) preferentially focused in the Entrance loop and the Key  
18 Coil/Loop in the CBD, which is located in the head domain <sup>14</sup>.

19 (E) For clarity, the co-crystal structure shows the ABbA-BabA interaction without Leb. Out  
20 of 15 bonds in total, the VL makes 3 bonds with the Entrance-loop and the VH makes the  
21 other 12 bonds, including the triple glycan mimicry (GM) domains. The BabA (grey loops  
22 and green  $\beta$ -strands) bound to ABbA-Fab (VH in lilac, VL in beige) with the amino acid  
23 residues that bind BabA indicated, including the hydrophobic W102 and L31 that  
24 substitute for the fucose residues. In addition, VH residues E33, S53, and G101 (in blue)  
25 form tight grips with the DSS triad. The VL also contributes with bonds to R242 and Q235.  
26 Q235 also binds to R59 in the VH and thus is the only BabA residue that binds to both the  
27 VH and VL.

28 (F) Structure of the 17875 BabA-CBD bound to and co-crystallized with Leb (Leb shown  
29 in cyan; PDB: 5F7W). The six sugar rings of Leb are indicated by A–F, where A and F are  
30 the secretor fucose and Lewis fucose, respectively, making  $\alpha$ 1.2 and  $\alpha$ 1.4 bonds with the  
31 Gal (B) and GlcNAc (C), respectively. The D and E residues constitute the lactose core  
32 and together with GlcNAc (C) form H-bonds (dashed lines) with the DSS residues located  
33 in the BabA Entrance loop. The secretor fucose makes many bonds with the CL2 loop,  
34 whereas the Lewis fucose interacts with the hydrophobic V231 residue located in the  
35 immediate proximity of the DSS triad <sup>13</sup>.

36 (G) The triple DSS-to-AAA mutant and the critical single S234A DSS mutant of BabA were  
37 expressed in *H. pylori* strain P1 $\Delta$ *babA*, where they demonstrated loss of both ABbA and  
38 Leb binding. Controls were the 17875/Leb BabA expressed in the P1 $\Delta$ *babA* strain  
39 (positive control) and the 17875*babA*1A2-minus mutant (negative control).

40 (H) BabA expression was verified by two (fused) immunoblots by BabA rabbit sera and  
41 showed that the expression level of BabA 17875/Leb in the *H. pylori* P1-DSS/AAA and  
42 P1-S234A mutant was similar to that of *H. pylori* P1 with the non-mutated BabA.

43

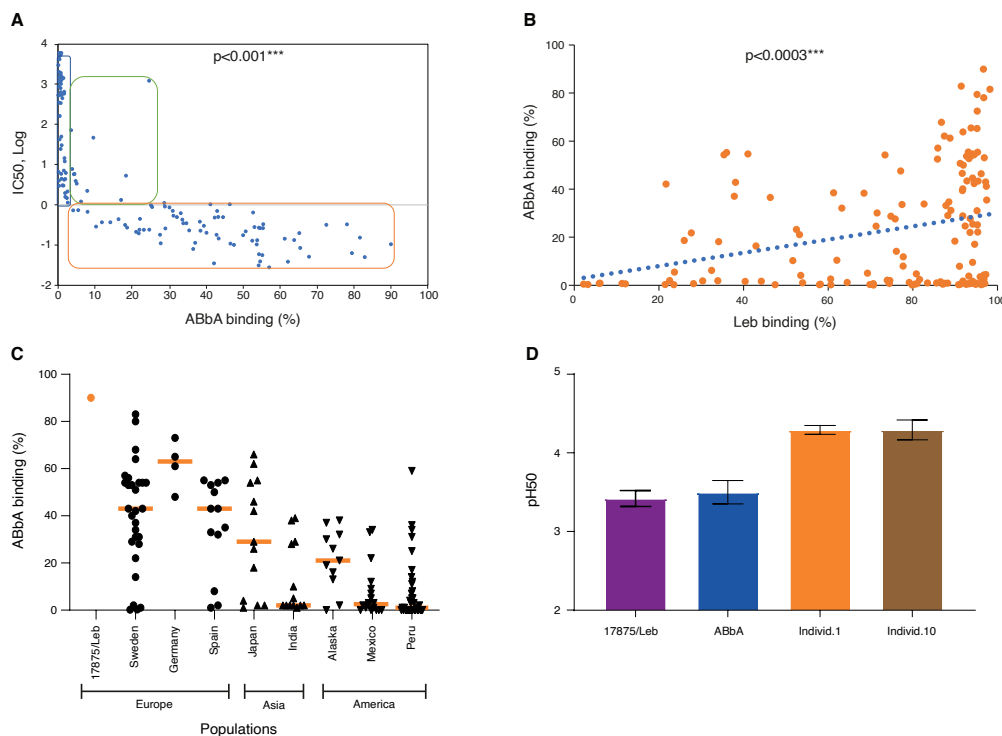

1  
2 **Fig 6. The ABbA global binding epitopes and their acid sensitivity in binding.**  
3 **(A)** The ABbA-IgG binding strength showed a strong correlation with the ABbA IC50  
4 **(Table S7)**. Spearman's rank correlation  $r = -0.881$  ( $p < 0.001$ ).  
5 **(B)** The ABbA and Leb binding strengths **(Table S7)** strongly correlate among global  
6 strains ( $r_s = 0.3$ ,  $p < 0.0003$ ). Thus, clinical isolates with higher binding strength for Leb  
7 most often bind ABbA-IgG with higher binding strength.  
8 **(C)** The ABbA-IgG binding strength is higher among European strains and also among  
9 strains from Japan, whereas strains from Southeast Asia (India) and North, South, and  
10 Latin America are lower in ABbA binding strength.  
11 **(D)** The acid sensitivity profiles, denoted as a pHgram, were determined by incubation of  
12 *H. pylori* with 125I-labeled Leb and ABbA-IgG and Fc-purified IgG antibodies from  
13 individuals 1 and 10 in the pH 6–2 interval <sup>14</sup>. The series of pH50s were repeated 3 times  
14 with SEMs. The test also showed that ~1% of the purified serum IgG bound to *H. pylori*,  
15 i.e., 0.1 mg/mL out of 10 mg/mL IgG. With this new understanding that the bbAb/ABbA  
16 content is 1/10,000 part of the IgG pool **(Figure 4D)**, we conclude that bbAb similarly to  
17 ABbA constitutes ~1% of the serum IgG in circulation that binds to *H. pylori*.  
18

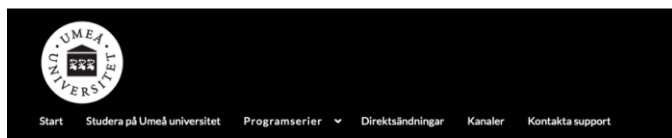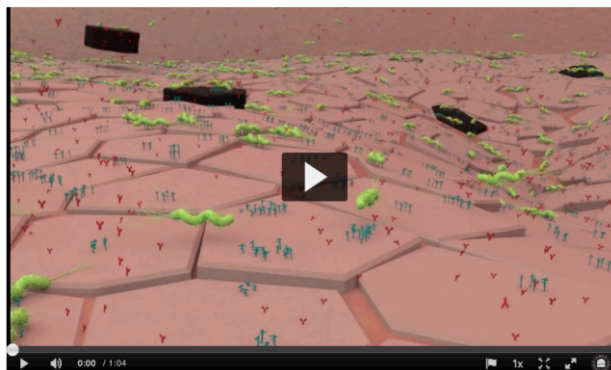

The life of *H. pylori* with a daily acid-wash in the pH gradient

1  
2 **Video S1.** [https://play.umu.se/media/t/0\\_bf1lh9qt](https://play.umu.se/media/t/0_bf1lh9qt)

3 **The life of *H. pylori* with a daily refreshing acid wash.**

4 The gastric onco-pathogen *H. pylori* lives in the stomach lining, referred to as the gastric  
5 epithelium. Close to the epithelial cells, the viscous mucus layer provides a bicarbonate  
6 buffer zone that protects the epithelial cell lining from the acidic gastric juice present in the  
7 stomach lumen just a third of a millimeter away. However, as the distance from the cell  
8 lining increases, the bicarbonate buffering fades to form a pH gradient that extends about  
9 half-way up the mucus layer. At this “altitude”, the impact of the very acidic gastric juice  
10 drops the pH back to pH1–2. The gastric juice is acidified by hydrochloric acid, which of  
11 course is too acidic for most microbes, *H. pylori* included. In this fascinating environment,  
12 *H. pylori* has adapted its life in the stomach to make life-long use of both the epithelial cell  
13 lining and the mucus layer pH gradient<sup>14,26</sup>. The more virulent *H. pylori* isolates bind the  
14 ABO blood group antigens (in blue) on the epithelial cell surfaces for firm bacterial  
15 attachment. In this prime location, *H. pylori* has full access to the necessary nutrients and  
16 iron leaching from the mucosal cells. However, pros come with cons, and the tight  
17 attachment exposes *H. pylori* to our immune system. The *H. pylori* infection is a major  
18 target of the humoral immune system, and the majority of carriers produce ELISA titers  
19 against *H. pylori* antigens. Hence, the *H. pylori* infections are exposed to high levels of  
20 antibodies (in red) that disseminate into the gastrointestinal tissues from the systemic  
21 circulation as well as from antibody-producing cells in both the stomach and gut lining.  
22 These antibodies bind to a plethora of *H. pylori* antigens such as the urease enzyme, LPS,  
23 heat-shock proteins, and the CagA effector protein. Although, the very best attempt  
24 possible by our immune system, the antibodies against *H. pylori* never manage protect  
25 against the *H. pylori* infection, which instead establish itself through adaptation and  
26 persists over the lifespan. The persistent infection is the cause of the chronic mucosal  
27 inflammation that in many millions of cases annually results in gastric disease, although  
28 of different degree of severity, ranging from mild and non-atrophic gastritis to “the silent  
29 killer” gastric cancer.

30 Our results suggest that the humoral immune system has found a way to balance the  
31 inflammation pressure by raising the bbAbs that prevent BabA adhesin from binding to



1 the ABO/Leb glycans. Thus, the bbAbs block or reduce attachment of the *H. pylori* bacteria  
2 to the cell surfaces in the epithelial lining. The bbAbs bind to folded structures in the  
3 carbohydrate binding domain (CBD) of the BabA attachment protein (the green hooks).  
4 This is illustrated by the *H. pylori* bacterial cell (located in the center) that is blocked by  
5 the bbAbs in binding the ABO glycans by the full set of BabA adhesins. Similarly, the  
6 bacterium to the left carries a multitude of bbAbs at its right pole and is barely hanging on  
7 in attachment to the cell surface ABO antigens.

8 To avoid detrimental consequences of the humoral defense and complement system  
9 activation, *H. pylori* can take advantage of the rapid gastric mucosal desquamation  
10 process, where epithelial cells are pushed into the mucus layer pH gradient. This is a  
11 natural, essential, and innate immune protective process and the epithelial cells undergo  
12 rapid turnover every 2–3 days and are continuously replaced with new cells proliferating  
13 from the stem cells located in the column-palisade just below. The protective mucus layer  
14 is renewed even faster, about twice per day. If these processes were irreversible and  
15 sufficient, the desquamation process would move and transport all attached *H. pylori*  
16 bacterial cells to the gastric juice where the bacteria would be destroyed by the acidic  
17 environment. If this were the case, the *H. pylori* infection would be naturally eradicated in  
18 a week or maybe two. But this does not take place and instead *H. pylori* adapts to the host  
19 and successfully persists for the lifetime of the individual.

20 Our new results suggest that *H. pylori* does not merely and passively adapt to the  
21 desquamation process but instead actively makes good use of it as a way to escape the  
22 humoral immune system. As the *H. pylori* cells that are attached to desquamating cells  
23 move upwards and through the mucus layer, they soon reach their first rejuvenation region  
24 at ~pH 4.5, where the majority of acid-sensitive antibodies and complement molecules  
25 are both de-attached and inactivated. After about 2 h and further out in the mucus layer,  
26 at the slightly lower pH 3.5, the *H. pylori* cells will rid themselves also of the more acid-  
27 resistant bbAbs.

28 But how do the *H. pylori* manage to detach from the desquamating cells? The BabA  
29 adhesin binds to the ABO/Leb antigens on the cell surface similarly to the glycan mimicry  
30 of the bbAbs. During the millennia of adaptation to the human gastric mucosa, the main  
31 attachment protein BabA has evolved to be acid sensitive in its binding to ABO/Leb blood  
32 group glycans. At the low pH 3.5, the majority of BabA no longer bind, and the *H. pylori*  
33 will come loose from the desquamating cells. Once free, “acid-washed”, and again fully  
34 motile, *H. pylori* uses its chemotactic sensors and flagella (Goers Sweeney *et. al*,  
35 *Structure*, 2012) to propel itself along the pH gradient from the epithelial cells back to the  
36 buffered epithelial surface by its reported rapid motility in the mucus zone<sup>65</sup>, *H. pylori* can  
37 in a short time return to the less acidic parts of the epithelial lining, where the bacteria  
38 cells can again reattach in a continuous recycling process. Thus, by taking advantage of  
39 the pH gradient, the *H. pylori* infection can escape the humoral effector molecules of the  
40 immune system and, in addition, can recycle the infection through natural bio-selection of  
41 those bacterial cells that have introduced mutations or induced or modified expression  
42 patterns that are the best suited for life in the local gastric environment. This also allows  
43 for adaptation to changes over the lifetime of the host. However, long-term infection by  
44 adherent *H. pylori* that cause chronic mucosal inflammation constitute the critical risk for  
45 gastric cancer development.

46

## 1 Supplemental Tables

2  
3 **Table S1A-F** related to **Figures 1** and **S1** and **2** and **S2** and **3**.  
4 Characteristics of Individuals from Karolinska University Hospital, Sweden; Kalixanda  
5 Study, Sweden; Sumy Regional Clinical Hospital, Ukraine; Baylor College of Medicine,  
6 Houston, TX, USA; Mexico UMAE Pediaatria, Mexico City, Mexico; Regional Children  
7 Hospital and St. Zinaida City Children Hospital, Sumy, Ukraine.

8  
9 **Table S2A-B** related to **Figures S1G** and **3A** and **S3A**.  
10 Leb-binding properties of Swedish and Mexican strains.

11  
12 **Table S3** related to rest of **Figures 3** and **S3**.  
13 Sera IT50 from Non-Atrophic Gastritis (NAG) and Duodenal Ulcer disease (DU) patients.

14  
15 **Table S4** related to **Figures 1** and **3** and **S1**  
16 The location of the IT50 = 30 interval in the different cohorts as identified by strain  
17 17875/Leb, and the location of IT50 positive vs. negative sera in the different cohorts  
18 identified by strain J166.

19  
20 **Table S5**. Crystallographic data collection and refinement statistics for the BabA protein  
21 co-crystallized with ABbA.

22  
23 **Table S6A**. Binding properties and IC50 of Eurasian *H. pylori* strains.  
24 S831, I109, and I119 are marked in red as the Specialists among 49 European and 27  
25 Asian strains.

26  
27 **Table S6B**. Binding properties and preferences and IC50 of North and South Indigenous  
28 American and Latin-American *H. pylori* strains.

29 ND - Not Determined

30 O - Specialists are the strains with >2.5 ratio in Leb/ALeb binding <sup>11</sup>.

31 A - Specialists are the strains with <0.4 ratio in Leb/ALeb binding <sup>11</sup>.

32  
33 **Table S7**. BabA alignment (aa 180–250) according to ABbA binding strength. Sequences  
34 that originated from <sup>11</sup> are indicated by a star (\*).

35 Sequences that originated from <sup>14</sup> are indicated by a triangle ( $\Delta$ ). Mexican Mc1215,  
36 Mc1207, and Mc1227 were sequenced by the J. Torres lab (co-author).

37  
38 **Table S8**. ABbA binding properties of global *H. pylori* strains and of generalist vs.  
39 specialist *H. pylori* strains.

40

41

1 **Table S1A**, related to **Figure 1** and **Figure S1**, **Figure 2** and **Figure S2** and **Figure 3**.  
2 **Characteristics of *H. pylori* ELISA-positive individuals from Karolinska University**  
3 **Hospital, Sweden.**  
4

| #  | Serum Code    | IT50<br>17875/Leb |
|----|---------------|-------------------|
| 1  | Individual 1  | 0                 |
| 2  | Individual 2  | 0                 |
| 3  | Individual 3  | 10                |
| 4  | Individual 4  | 252               |
| 5  | Individual 5  | 20                |
| 6  | Individual 6  | 1643              |
| 7  | Individual 7  | 448               |
| 8  | Individual 8  | 0                 |
| 9  | Individual 9  | 0                 |
| 10 | Individual 10 | 2168              |
| 11 | Individual 11 | 17                |
| 12 | Individual 12 | 0                 |
| 13 | Individual 13 | 0                 |
| 14 | Individual 14 | 0                 |
| 15 | Individual 15 | 0                 |
| 16 | Individual 16 | 1280              |
| 17 | Individual 17 | 9                 |
| 18 | Individual 18 | 6                 |
| 19 | Individual 19 | 0                 |
| 20 | Individual 20 | 0                 |
| 21 | Individual 21 | 0                 |
| 22 | Individual 22 | 0                 |
| 23 | Individual 23 | 20                |
| 24 | Individual 24 | 141               |
| 25 | Individual 25 | 132               |
| 26 | Individual 26 | 157               |
| 27 | Individual 27 | 674               |
| 28 | Individual 28 | 0                 |
| 29 | Individual 29 | 0                 |
| 30 | Individual 30 | 59                |
| 31 | Individual 31 | 107               |
| 32 | Individual 32 | 0                 |
| 33 | Individual 33 | 7                 |
| 34 | Individual 34 | 51                |
| 35 | Individual 35 | 14                |
| 36 | Individual 36 | 2041              |
| 37 | Individual 37 | 0                 |
| 38 | Individual 38 | 43                |

5

1 **Table S1B** related to **Figure 1** and **Figure S1** and **Figure 3**.  
 2 **Characteristics of Individuals from Kalixanda Study, Sweden.**  
 3

4 The serum samples are displayed according to IT50s tested with *H. pylori* strain  
 5 17875/Leb. In addition, *H. pylori* strain J166 identified the series of IT50 titers as positive  
 6 (+) or negative (-). The location for the background level (the start of the positive IT50  
 7 sample is indicated by the horizontal bar) was calibrated with sera from ELISA-negative  
 8 individuals using *H. pylori* J166.  
 9

| #   | Serum Code | Sex | Age | ELISA            |      | IT50      |      |
|-----|------------|-----|-----|------------------|------|-----------|------|
|     |            |     |     | <i>H. pylori</i> | CagA | 17875/Leb | J166 |
| 322 | K1260      | F   | 67  | 116.9            | 1    | 1314      | +    |
| 321 | H1959      | M   | 66  | 47.7             | 1    | 931       | +    |
| 320 | H87        | F   | 76  | 127.8            | 1    | 748       | +    |
| 319 | K1047      | F   | 71  | 77.8             | 1    | 564       | +    |
| 318 | K275       | M   | 72  | 103.9            | 1    | 489       | +    |
| 317 | H2529      | M   | 40  | 120.3            | 1    | 461       | +    |
| 316 | K1384      | M   | 60  | 103.5            | 1    | 458       | +    |
| 315 | K1421      | F   | 64  | 107.1            | 1    | 427       | +    |
| 314 | H2821      | F   | 65  | 88               | 1    | 416       | +    |
| 313 | H1376      | F   | 74  | 58.9             | 1    | 376       | +    |
| 312 | K2789      | M   | 47  | 36.5             | 0    | 355       | +    |
| 311 | H2441      | F   | 51  | 108.6            | 1    | 343       | +    |
| 310 | K2593      | F   | 78  | 124.8            | 1    | 329       | +    |
| 309 | K2787      | M   | 77  | 119.5            | 1    | 321       | +    |
| 308 | H2905      | M   | 62  | 117.3            | 1    | 305       | +    |
| 307 | H2181      | M   | 62  | 112.8            | 1    | 297       | +    |
| 306 | H824       | F   | 44  | 119.8            | 1    | 294       | +    |
| 305 | K49        | M   | 74  | 72.9             | 0    | 292       | +    |
| 304 | H244       | M   | 44  | 15.2             | 1    | 280       | +    |
| 303 | K1999      | M   | 82  | 92.6             | 1    | 259       | +    |
| 302 | K1488      | M   | 58  | 123.9            | 1    | 255       | +    |
| 301 | H1218      | F   | 70  | 98.5             | 1    | 250       | +    |
| 300 | H2162      | M   | 39  | 21.1             | 1    | 243       | +    |
| 299 | H278       | M   | 72  | 106.8            | 1    | 236       | +    |
| 298 | K1614      | M   | 65  | 100.5            | 1    | 234       | +    |
| 297 | H2574      | M   | 72  | 48.3             | 1    | 230       | +    |
| 296 | K2498      | F   | 62  | 113.6            | 0    | 206       | +    |
| 295 | K2608      | M   | 32  | 125.8            | 1    | 199       | +    |
| 294 | H2854      | F   | 67  | 116              | 1    | 194       | +    |
| 293 | K1415      | M   | 66  | 17.1             | 1    | 186       | +    |
| 292 | K956       | M   | 66  | 103.9            | 1    | 186       | +    |
| 291 | K15        | F   | 53  | 128.3            | 1    | 185       | +    |
| 290 | H988       | F   | 67  | 56.6             | 1    | 180       | +    |
| 289 | K2600      | F   | 77  | 27               | 1    | 179       | +    |

|     |       |   |    |       |   |     |   |
|-----|-------|---|----|-------|---|-----|---|
| 288 | K2644 | F | 56 | 116.8 | 1 | 173 | + |
| 287 | H814  | F | 52 | 109.2 | 1 | 170 | + |
| 286 | H2000 | F | 59 | 106.3 | 1 | 168 | + |
| 285 | K2042 | F | 72 | 130.7 | 1 | 161 | + |
| 284 | H197  | M | 69 | 72.5  | 1 | 157 | + |
| 283 | H18   | F | 57 | 41.9  | 1 | 153 | + |
| 282 | K295  | M | 59 | 104.3 | 1 | 150 | + |
| 281 | K1829 | M | 38 | 78.7  | 1 | 149 | + |
| 280 | H1262 | M | 71 | 114.9 | 0 | 148 | + |
| 279 | H812  | F | 25 | 27.2  | 1 | 145 | + |
| 278 | H2876 | M | 35 | 113.5 | 1 | 145 | + |
| 277 | H1833 | F | 64 | 113   | 1 | 144 | + |
| 276 | K2026 | F | 70 | 91    | 1 | 138 | + |
| 275 | H2842 | F | 80 | 121.1 | 1 | 137 | + |
| 274 | H817  | F | 77 | 82.4  | 1 | 133 | + |
| 273 | H2022 | F | 67 | 120.4 | 1 | 132 | + |
| 272 | H1011 | M | 72 | 43.6  | 1 | 132 | + |
| 271 | K2534 | M | 76 | 94.1  | 1 | 131 | + |
| 270 | K1604 | M | 78 | 83    | 1 | 128 | + |
| 269 | H1890 | M | 59 | 123.7 | 1 | 123 | + |
| 268 | K2770 | F | 77 | 114.1 | 1 | 122 | + |
| 267 | K1243 | M | 69 | 114.7 |   | 122 | + |
| 266 | H853  | F | 73 | 145.3 | 1 | 120 | + |
| 265 | H783  | M | 70 | 77.9  | 1 | 119 | + |
| 264 | K745  | F | 73 | 130.9 | 1 | 119 | + |
| 263 | K1953 | M | 53 | 98.9  | 0 | 118 | + |
| 262 | H1517 | M | 64 | 105.3 | 1 | 116 | + |
| 261 | K638  | F | 64 | 79.8  | 1 | 116 | + |
| 260 | H2215 | F | 46 | 50.9  | 1 | 116 | + |
| 259 | K364  | F | 67 | 94.2  | 1 | 115 | + |
| 258 | K366  | F | 51 | 72.7  | 1 | 114 | + |
| 257 | H2442 | F | 59 | 82.8  | 1 | 111 | + |
| 256 | K450  | F | 76 | 48.9  | 1 | 110 | + |
| 255 | H2924 | F | 54 | 117.7 | 0 | 110 | + |
| 254 | K1650 | M | 74 | 101.1 |   | 105 | + |
| 253 | H810  | F | 69 | 136.7 | 0 | 103 | + |
| 252 | K681  | F | 68 | 121.2 | 1 | 102 | + |
| 251 | H234  | M | 69 | 128.8 | 1 | 102 | + |
| 250 | H1409 | M | 62 | 98.5  | 1 | 101 | + |
| 249 | K1924 | M | 47 | 58.5  | 1 | 100 | + |
| 248 | H262  | F | 71 | 46    | 1 | 100 | + |
| 247 | H649  | F | 70 | 131.6 | 1 | 98  | + |
| 246 | H2877 | F | 54 | 117.8 | 1 | 95  | + |
| 245 | H1905 | M | 71 | 130.6 | 1 | 95  | + |
| 244 | K1022 | M | 50 | 122.1 | 1 | 94  | + |

|     |       |   |    |       |   |    |   |
|-----|-------|---|----|-------|---|----|---|
| 243 | K2429 | M | 81 | 60.5  | 1 | 94 | + |
| 242 | K1013 | M | 21 | 101.1 | 1 | 93 | + |
| 241 | K299  | M | 51 | 116.3 | 1 | 93 | + |
| 240 | K2462 | M | 80 | 20.5  | 1 | 92 | + |
| 239 | K2090 | F | 43 | 134.3 | 1 | 91 | + |
| 238 | K2765 | M | 62 | 72.6  | 0 | 91 | + |
| 237 | K906  | F | 56 | 14.2  | 1 | 91 | + |
| 236 | H1485 | F | 59 | 39.7  | 1 | 90 | + |
| 235 | K1928 | F | 66 | 96.6  | 1 | 89 | + |
| 234 | K2762 | M | 67 | 92.1  | 1 | 89 | + |
| 233 | K1520 | F | 68 | 54.3  | 1 | 87 | + |
| 232 | K135  | M | 53 | 65.8  | 1 | 85 | + |
| 231 | K2030 | F | 64 | 89.9  | 1 | 82 | + |
| 230 | K833  | M | 48 | 113.2 | 1 | 80 | + |
| 229 | K2246 | M | 71 | 59.7  | 1 | 75 | + |
| 228 | K2074 | F | 52 | 84.1  | 1 | 74 | + |
| 227 | H2891 | F | 57 | 90.1  | 1 | 74 | + |
| 226 | K1289 | F | 74 | 128.7 | 1 | 73 | + |
| 225 | K1964 | F | 69 | 64    | 1 | 72 | + |
| 224 | H1207 | F | 64 | 93.3  | 1 | 71 | + |
| 223 | H2705 | F | 68 | 132.9 | 1 | 69 | + |
| 222 | H1804 | F | 55 | 86.1  | 1 | 69 | + |
| 221 | K1248 | M | 65 | 110.9 | 1 | 68 | + |
| 220 | H718  | M | 62 | 68.9  | 1 | 66 | + |
| 219 | K2156 | M | 40 | 40.8  | 1 | 66 | + |
| 218 | H2012 | M | 75 | 101.6 | 1 | 66 | + |
| 217 | K2570 | F | 76 | 83.6  |   | 64 | + |
| 216 | H93   | F | 35 | 90.2  | 1 | 64 | + |
| 215 | H2626 | M | 74 | 117.6 | 1 | 63 | + |
| 214 | H907  | F | 63 | 119.9 | 1 | 63 | + |
| 213 | H701  | M | 69 | 8.8   | 1 | 62 | + |
| 212 | H926  | M | 75 | 131.9 | 1 | 62 | + |
| 211 | K2132 | F | 63 | 97.8  | 1 | 62 | + |
| 210 | H267  | F | 73 | 60.6  | 1 | 62 | + |
| 209 | H1473 | M | 69 | 98.4  | 1 | 61 | + |
| 208 | H2268 | F | 56 | 84.4  | 1 | 61 | + |
| 207 | H1458 | M | 67 | 106.9 | 1 | 60 | + |
| 206 | H840  | M | 67 | 92.5  | 1 | 59 | + |
| 205 | K2067 | M | 39 | 75.5  | 1 | 59 | + |
| 204 | K377  | F | 72 | 122.8 | 0 | 55 | + |
| 203 | K959  | F | 61 | 135.8 | 1 | 54 | + |
| 202 | K2783 | F | 52 | 52.4  | 1 | 54 | + |
| 201 | H1247 | M | 71 | 91.8  | 1 | 53 | + |
| 200 | K2840 | F | 57 | 66.7  | 1 | 53 | + |
| 199 | H1391 | M | 36 | 64.2  | 1 | 53 | + |

|     |       |   |    |       |   |    |   |
|-----|-------|---|----|-------|---|----|---|
| 198 | H624  | F | 68 | 124.8 | 1 | 52 | + |
| 197 | H964  | F | 35 | 36.6  | 1 | 52 | + |
| 196 | K1294 | F | 78 | 87.1  | 1 | 50 | + |
| 195 | K2606 | M | 63 | 127.3 | 0 | 49 | + |
| 194 | K30   | F | 51 | 121.4 | 1 | 48 | + |
| 193 | H2780 | F | 47 | 106   | 1 | 46 | + |
| 192 | H1240 | F | 57 | 103.6 | 1 | 44 | + |
| 191 | K2841 | F | 37 | 73.2  | 1 | 44 | + |
| 190 | H1934 | F | 80 | 110.7 | 1 | 43 | + |
| 189 | H1401 | F | 52 | 101.6 | 1 | 43 | + |
| 188 | K2844 | F | 79 | 90.9  | 0 | 41 | + |
| 187 | K1569 | M | 70 | 117.4 | 1 | 41 | + |
| 186 | K2135 | M | 55 | 65.4  | 1 | 40 | + |
| 185 | H2857 | M | 51 | 94    | 1 | 40 | + |
| 184 | H2007 | M | 56 | 59.2  | 1 | 38 | + |
| 183 | H118  | F | 28 | 79.9  | 1 | 38 | + |
| 182 | K1073 | M | 73 | 105   | 1 | 36 | + |
| 181 | K2878 | M | 61 | 74.5  | 1 | 36 | + |
| 180 | H373  | F | 73 | 129.7 | 1 | 35 | + |
| 179 | K2837 | M | 73 | 131.5 | 0 | 35 | + |
| 178 | K326  | M | 59 | 92.2  | 1 | 35 | + |
| 177 | H259  | F | 62 | 122.5 | 1 | 34 | + |
| 176 | K2740 | M | 77 | 102.5 | 1 | 34 | + |
| 175 | H690  | F | 57 | 81.1  | 1 | 34 | + |
| 174 | H2450 | F | 79 | 79.9  | 1 | 33 | + |
| 173 | K384  | M | 52 | 111.4 | 1 | 33 | + |
| 172 | K2580 | M | 58 | 11.8  | 1 | 33 | + |
| 171 | H157  | M | 65 | 139.8 | 1 | 31 | + |
| 170 | H2811 | M | 50 | 91.1  | 0 | 30 | + |
| 169 | H1351 | M | 51 | 74.6  | 1 | 30 | + |
| 168 | H2260 | F | 78 | 113.8 | 1 | 28 | + |
| 167 | K199  | M | 64 | 109.2 | 1 | 28 | + |
| 166 | K731  | M | 68 | 122.3 | 1 | 27 | + |
| 165 | K1117 | F | 47 | 13.9  | 1 | 26 | + |
| 164 | H786  | M | 49 | 30.4  | 1 | 25 | + |
| 163 | H1615 | M | 55 | 125.8 | 1 | 24 | + |
| 162 | K2079 | M | 71 | 124.4 | 1 | 24 | + |
| 161 | H2830 | M | 37 | 97.4  | 0 | 24 | + |
| 160 | K381  | M | 60 | 110.6 | 1 | 24 | + |
| 159 | K1880 | F | 63 | 99.4  | 1 | 24 | + |
| 158 | K17   | M | 71 | 112   | 1 | 24 | + |
| 157 | H1579 | M | 71 | 88.8  | 1 | 23 | + |
| 156 | K1275 | M | 49 | 99    | 0 | 23 | + |
| 155 | K105  | F | 45 | 71.7  | 1 | 22 | + |
| 154 | H351  | F | 42 | 110   | 1 | 22 | + |

|     |       |   |    |       |   |    |   |
|-----|-------|---|----|-------|---|----|---|
| 153 | H2421 | M | 48 | 99.8  | 1 | 22 | + |
| 152 | K2890 | F | 28 | 34.6  | 0 | 22 | + |
| 151 | K2104 | F | 25 | 27.8  | 1 | 21 | + |
| 150 | K2627 | M | 54 | 98    | 1 | 21 | + |
| 149 | H57   | F | 66 | 80.3  | 1 | 20 | + |
| 148 | H1560 | M | 56 | 116   | 1 | 20 | + |
| 147 | H2806 | F | 77 | 82.1  | 0 | 20 | + |
| 146 | H1949 | F | 72 | 98.5  | 1 | 20 | + |
| 145 | K2540 | F | 74 | 99.1  | 1 | 19 | + |
| 144 | K328  | F | 68 | 115   | 1 | 19 | + |
| 143 | H2807 | F | 74 | 83.6  | 1 | 19 | + |
| 142 | K430  | M | 55 | 81    | 1 | 19 | + |
| 141 | H2618 | M | 45 | 131.6 | 1 | 19 | + |
| 140 | H2700 | F | 64 | 108.9 | 1 | 19 | + |
| 139 | K312  | M | 58 | 90.6  | 1 | 19 | + |
| 138 | K993  | M | 70 | 120.8 | 1 | 19 | + |
| 137 | K322  | M | 44 | 100.5 | 1 | 18 | + |
| 136 | H2645 | M | 60 | 56.2  | 0 | 18 | + |
| 135 | K56   | M | 64 | 87.2  | 1 | 18 | + |
| 134 | K34   | M | 72 | 65.4  | 1 | 17 | + |
| 133 | H2211 | F | 60 | 99.9  | 1 | 17 | + |
| 132 | H2885 | M | 59 | 90    | 1 | 17 | + |
| 131 | K2434 | M | 68 | 72.7  | 1 | 17 | + |
| 130 | H303  | F | 45 | 77.9  | 1 | 17 | + |
| 129 | K2164 | F | 67 | 26.3  | 1 | 17 | + |
| 128 | K1807 | M | 56 | 115   | 1 | 17 | + |
| 127 | K2718 | M | 48 | 90.6  | 0 | 17 | + |
| 126 | K1966 | F | 68 | 114.7 | 1 | 17 | + |
| 125 | K435  | F | 64 | 20.5  | 1 | 16 | + |
| 124 | K632  | M | 52 | 126.3 | 1 | 16 | + |
| 123 | H207  | M | 54 | 57.4  | 1 | 16 | + |
| 122 | K416  | F | 62 | 117.1 | 0 | 16 | + |
| 121 | K735  | M | 49 | 33.7  | 1 | 16 | + |
| 120 | K1369 | F | 44 | 98.2  | 1 | 16 | + |
| 119 | K279  | M | 39 | 106.9 | 1 | 15 | + |
| 118 | H1212 | F | 65 | 64.1  | 1 | 15 | + |
| 117 | H2206 | M | 47 | 23.4  | 1 | 15 | + |
| 116 | H1078 | F | 38 | 79.2  | 1 | 15 | + |
| 115 | K2478 | M | 41 | 87.2  | 1 | 14 | + |
| 114 | H1551 | F | 56 | 118.6 | 1 | 14 | + |
| 113 | H605  | F | 40 | 113.3 | 0 | 14 | + |
| 112 | K2070 | M | 75 | 120.4 | 0 | 13 | + |
| 111 | K892  | F | 68 | 82.6  | 1 | 13 | + |
| 110 | H1375 | F | 37 | 135.2 |   | 13 | + |
| 109 | K2526 | M | 55 | 108.9 | 1 | 13 | + |



|     |       |   |    |       |   |    |   |
|-----|-------|---|----|-------|---|----|---|
| 108 | K697  | M | 62 | 107.3 | 1 | 13 | + |
| 107 | K2198 | F | 69 | 91.3  | 1 | 13 | + |
| 106 | K1389 | F | 58 | 112.9 | 1 | 13 | + |
| 105 | K1237 | F | 61 | 51.8  | 1 | 13 | + |
| 104 | K2244 | M | 64 | 118.7 | 1 | 13 | + |
| 103 | K395  | F | 43 | 110.8 | 1 | 13 | + |
| 102 | K1292 | F | 75 | 78.3  | 1 | 13 | + |
| 101 | H1426 | M | 58 | 109.7 | 1 | 13 | + |
| 100 | K1425 | M | 44 | 108.5 | 0 | 13 | + |
| 99  | H258  | F | 47 | 76.4  | 0 | 12 | + |
| 98  | K28   | F | 67 | 117.3 | 0 | 12 | + |
| 97  | H2829 | M | 73 | 64.9  | 1 | 12 | + |
| 96  | K2951 | M | 62 | 135.7 | 0 | 12 | + |
| 95  | K2118 | F | 58 | 32.3  | 1 | 12 | + |
| 94  | H2886 | M | 32 | 25.5  | 0 | 12 | + |
| 93  | H84   | F | 57 | 95    | 1 | 12 | + |
| 92  | K1446 | M | 60 | 94.1  | 0 | 12 | + |
| 91  | K2707 | F | 44 | 85.7  | 1 | 12 | + |
| 90  | K2625 | M | 79 | 56.8  | 0 | 12 | + |
| 89  | K940  | F | 53 | 115.3 | 1 | 12 | + |
| 88  | H2180 | F | 59 | 94.5  | 0 | 12 | + |
| 87  | K2464 | M | 49 | 118.4 | 1 | 12 | + |
| 86  | K809  | F | 34 | 125.8 | 1 | 12 | + |
| 85  | K2539 | M | 41 | 90.7  | 1 | 11 | + |
| 84  | K966  | F | 60 | 44.4  | 1 | 11 | + |
| 83  | K652  | F | 28 | 23.8  | 0 | 11 | + |
| 82  | K59   | M | 50 | 126.9 | 1 | 11 | + |
| 81  | H21   | M | 49 | 77.9  | 0 | 11 | + |
| 80  | K2136 | F | 59 | 69.3  | 0 | 11 | + |
| 79  | K1972 | F | 69 | 129.2 | 0 | 11 | + |
| 78  | K2699 | F | 59 | 69.1  | 0 | 11 | + |
| 77  | H2117 | M | 52 | 124.7 | 1 | 10 | + |
| 76  | K2730 | M | 57 | 97.4  | 0 | 10 | + |
| 75  | K83   | M | 53 | 92.4  | 1 | 10 | + |
| 74  | K1427 | M | 30 | 62.8  | 1 | 10 | + |
| 73  | H604  | M | 53 | 123.2 | 1 | 10 | + |
| 72  | K2190 | F | 53 | 74.8  | 0 | 10 | + |
| 71  | K2054 | M | 55 | 104   | 1 | 10 | + |
| 70  | K2864 | M | 46 | 31.5  | 0 | 10 | + |
| 69  | K1126 | F | 55 | 94.8  | 1 | 10 | + |
| 68  | K935  | M | 64 | 105.2 | 1 | 10 | + |
| 67  | H1034 | F | 52 | 99.9  | 1 | 9  | + |
| 66  | K2611 | M | 51 | 89.9  | 0 | 9  | + |
| 65  | H90   | M | 55 | 122.2 | 0 | 9  | + |
| 64  | K54   | M | 52 | 31.7  | 1 | 9  | + |

|              |       |   |    |       |   |   |   |
|--------------|-------|---|----|-------|---|---|---|
| 63           | H1533 | F | 62 | 111.4 | 0 | 9 | + |
| 62           | H356  | M | 22 | 97.2  | 0 | 9 | + |
| 61           | K2014 | F | 58 | 94.3  | 0 | 9 | + |
| 60           | K2814 | F | 65 | 63.6  | 0 | 8 | + |
| 59           | H2128 | M | 43 | 72.1  | 1 | 8 | + |
| 58           | K2032 | M | 57 | 78.8  | 1 | 8 | + |
| 57           | K730  | M | 66 | 93    | 1 | 8 | + |
| 56           | K1899 | F | 61 | 61.4  | 1 | 8 | + |
| 55           | K2130 | F | 70 | 81.5  | 0 | 8 | + |
| 54           | K1432 | M | 43 | 73.3  | 0 | 8 | + |
| <b>-----</b> |       |   |    |       |   |   |   |
| 53           | K1817 | M | 51 | 40.2  |   | - | - |
| 52           | K155  | F | 78 | 113.6 | 1 | - | - |
| 51           | K2108 | F | 69 | 132.3 | 0 | - | - |
| 50           | K1561 | F | 51 | 49.3  | 1 | - | - |
| 49           | H1979 | M | 54 | 119.3 | 1 | - | - |
| 48           | K789  | F | 43 | 111.4 | 0 | - | - |
| 47           | K2420 | M | 70 | 105   | 1 | - | - |
| 46           | H1254 | F | 61 | 113.6 | 1 | - | - |
| 45           | H2406 | F | 50 | 119.5 | 0 | - | - |
| 44           | K1836 | F | 72 | 52.4  | 1 | - | - |
| 43           | K1805 | M | 45 | 50.4  | 0 | - | - |
| 42           | K870  | F | 44 | 9.5   | 1 | - | - |
| 41           | H319  | M | 62 | 90    | 0 | - | - |
| 40           | H1224 | M | 54 | 94.8  | 1 | - | - |
| 39           | K2994 | M | 61 | 80.3  | 0 | - | - |
| 38           | K100  | F | 36 | 92.9  | 0 | - | - |
| 37           | H298  | F | 71 | 121   | 0 | - | - |
| 36           | K1837 | M | 35 | 63.2  | 0 | - | - |
| 35           | K1858 | F | 65 | 79.4  | 0 | - | - |
| 34           | H1327 | M | 56 | 88.4  | 1 | - | - |
| 33           | K108  | M | 50 | 122   | 1 | - | - |
| 32           | K2250 | F | 60 | 75.6  | 0 | - | - |
| 31           | K1825 | F | 39 | 110.5 | 1 | - | - |
| 30           | H687  | F | 76 | 28.9  | 1 | - | - |
| 29           | H1436 | F | 44 | 22.5  | 0 | - | - |
| 28           | H85   | F | 40 | 11.3  | 1 | - | - |
| 27           | K2504 | F | 72 |       | 1 | - | - |
| 26           | K2093 | M | 64 | 117.6 | 0 | - | - |
| 25           | K1326 | M | 57 | 96.5  | 0 | - | - |
| 24           | H1592 | F | 51 | 66.8  | 0 | - | - |
| 23           | K1806 | M | 72 | 109.4 | 1 | - | - |
| 22           | K1611 | F | 64 | 15.3  | 1 | - | - |
| 21           | K831  | F | 54 | 130.9 | 0 | - | - |
| 20           | K877  | F | 42 | 7.6   | 1 | - | - |

|    |       |   |    |       |   |   |   |
|----|-------|---|----|-------|---|---|---|
| 19 | K976  | F | 32 | 71    | 1 | - | - |
| 18 | K2087 | M | 48 | 127.7 | 0 | - | - |
| 17 | H196  | F | 64 | 105.9 | 1 | - | - |
| 16 | H2588 | F | 27 | 125.4 | 0 | - | - |
| 15 | H107  | M | 46 | 119.1 | 1 | - | - |
| 14 | H119  | M | 46 | 83.2  | 0 | - | - |
| 13 | K865  | F | 62 | 108.6 | 0 | - | - |
| 12 | H914  | F | 59 | 80.8  | 0 | - | - |
| 11 | H921  | M | 54 | 58.8  | 1 | - | - |
| 10 | H965  | F | 54 | 7.4   | 1 | - | - |
| 9  | K1082 | F | 55 | 49.1  | 0 | - | - |
| 8  | H1281 | M | 36 | 18.9  | 1 | - | - |
| 7  | H1641 | M | 69 | 61.9  | 0 | - | - |
| 6  | H1871 | M | 48 | 117.8 | 1 | - | - |
| 5  | K1993 | M | 72 | 16.9  | 0 | - | - |
| 4  | H2008 | M | 62 | 110.2 | 1 | - | - |
| 3  | K2059 | F | 41 | 90.8  | 1 | - | - |
| 2  | K2587 | M | 59 | 91.9  | 0 | - | - |
| 1  | K2906 | M | 63 | 100.7 | 1 | - | - |

1  
2

1 **Table S1C** related to **Figure S1** and **Figure 3**.  
 2 **Characteristics of *H. pylori* ELISA-positive patients from Sumy Regional Clinical**  
 3 **Hospital, Ukraine.**

4 The serum samples are displayed according to IT50s tested with *H. pylori* strain  
 5 17875/Leb. In addition, *H. pylori* strain J166 identified the series of IT50 titers as positive  
 6 (+) or negative (-). The location for the background level (the start of the positive IT50  
 7 sample is indicated by the horizontal bar) was calibrated with sera from ELISA-negative  
 8 individuals using *H. pylori* J166.

| #  | Serum Code | IT50      |      |
|----|------------|-----------|------|
|    |            | 17875/Leb | J166 |
| 79 | UA-96      | 1159      | +    |
| 78 | UA-24      | 1023      | +    |
| 77 | UA-2       | 476       | +    |
| 76 | UA-84      | 455       | +    |
| 75 | UA-104     | 232       | +    |
| 74 | UA-80      | 232       | +    |
| 73 | UA-82      | 203       | +    |
| 72 | UA-78      | 165       | +    |
| 71 | UA-83      | 160       | +    |
| 70 | UA-39      | 135       | +    |
| 69 | UA-9       | 130       | +    |
| 68 | UA-31      | 130       | +    |
| 67 | UA-16      | 125       | +    |
| 66 | UA-23      | 118       | +    |
| 65 | UA-13      | 116       | +    |
| 64 | UA-98      | 113       | +    |
| 63 | UA-11      | 112       | +    |
| 62 | UA-38      | 108       | +    |
| 61 | UA-66      | 107       | +    |
| 60 | UA-40      | 79        | +    |
| 59 | UA-42      | 78        | +    |
| 58 | UA-6       | 71        | +    |
| 57 | UA-86      | 69        | +    |
| 56 | UA-88      | 69        | +    |
| 55 | UA-8       | 63        | +    |
| 54 | UA-62      | 61        | +    |
| 53 | UA-75      | 57        | +    |
| 52 | UA-21      | 48        | +    |
| 51 | UA-15      | 46        | +    |
| 50 | UA-77      | 38        | +    |
| 49 | UA-10      | 27        | +    |
| 48 | UA-43      | 23        | +    |
| 47 | UA-25      | 20        | +    |
| 46 | UA-79      | 19        | +    |
| 45 | UA-60      | 19        | +    |

|          |        |    |   |
|----------|--------|----|---|
| 44       | UA-72  | 17 | + |
| 43       | UA-46  | 16 | + |
| 42       | UA-41  | 14 | + |
| 41       | UA-44  | 12 | + |
| 40       | UA-100 | 12 | + |
| 39       | UA-63  | 11 | + |
| 38       | UA-70  | 10 | + |
| 37       | UA-52  | 8  | + |
| 36       | UA-12  | 5  | + |
| <b> </b> |        |    |   |
| 35       | UA-32  | -  | - |
| 34       | UA-14  | -  | - |
| 33       | UA-97  | -  | - |
| 32       | UA-50  | -  | - |
| 31       | UA-59  | -  | - |
| 30       | UA-36  | -  | - |
| 29       | UA-17  | -  | - |
| 28       | UA-89  | -  | - |
| 27       | UA-65  | -  | - |
| 26       | UA-49  | -  | - |
| 25       | UA-76  | -  | - |
| 24       | UA-54  | -  | - |
| 23       | UA-7   | -  | - |
| 22       | UA-20  | -  | - |
| 21       | UA-73  | -  | - |
| 20       | UA-53  | -  | - |
| 19       | UA-74  | -  | - |
| 18       | UA-22  | -  | - |
| 17       | UA-105 | -  | - |
| 16       | UA-57  | -  | - |
| 15       | UA-27  | -  | - |
| 14       | UA-35  | -  | - |
| 13       | UA-5   | -  | - |
| 12       | UA-26  | -  | - |
| 11       | UA-34  | -  | - |
| 10       | UA-55  | -  | - |
| 9        | UA-90  | -  | - |
| 8        | UA-94  | -  | - |
| 7        | UA-30  | -  | - |
| 6        | UA-103 | -  | - |
| 5        | UA-28  | -  | - |
| 4        | UA-92  | -  | - |
| 3        | UA-95  | -  | - |
| 2        | UA-61  | -  | - |
| 1        | UA-91  | -  | - |

1 **Table S1D** related to **Figure S1** and **Figure 3**.  
2 **Characteristics of *H. pylori* ELISA-positive patients from Baylor College of**  
3 **Medicine, Houston, TX, USA.**

4  
5 The serum samples are displayed according to IT50s tested with *H. pylori* strain  
6 17875/Leb. In addition, *H. pylori* strain J166 identified the series of IT50 titers as positive  
7 (+) or negative (-). The location for the background level (the start of the positive IT50  
8 sample is indicated by the horizontal bar) was calibrated with sera from ELISA-negative  
9 individuals using *H. pylori* J166.

10

| #   | Serum Code | IT50      |      |
|-----|------------|-----------|------|
|     |            | 17875/Leb | J166 |
| 141 | 11352      | 794       | +    |
| 140 | 11377 A    | 350       | +    |
| 139 | 12478      | 312       | +    |
| 138 | 11360      | 289       | +    |
| 137 | 12121 A    | 274       | +    |
| 136 | 12150 A    | 268       | +    |
| 135 | 12364      | 252       | +    |
| 134 | 12490      | 242       | +    |
| 133 | 11526      | 221       | +    |
| 132 | 11883 B    | 171       | +    |
| 131 | 11358 B    | 156       | +    |
| 130 | 11263      | 146       | +    |
| 129 | 13182      | 145       | +    |
| 128 | 12866      | 131       | +    |
| 127 | 11361      | 111       | +    |
| 126 | 12838      | 109       | +    |
| 125 | 11538      | 105       | +    |
| 124 | 12381      | 105       | +    |
| 123 | 12424      | 104       | +    |
| 122 | 13192      | 96        | +    |
| 121 | 12609      | 96        | +    |
| 120 | 11327      | 93        | +    |
| 119 | 12804      | 87        | +    |
| 118 | 12854      | 84        | +    |
| 117 | 13178      | 82        | +    |
| 116 | 13185      | 81        | +    |
| 115 | 11240      | 80        | +    |
| 114 | 13789      | 79        | +    |
| 113 | 12562      | 75        | +    |
| 112 | 12815      | 75        | +    |
| 111 | 12456      | 63        | +    |
| 110 | 12643      | 60        | +    |
| 109 | 11369 A    | 58        | +    |

|     |         |    |   |
|-----|---------|----|---|
| 108 | 11326   | 57 | + |
| 107 | 11344 A | 55 | + |
| 106 | 12342   | 53 | + |
| 105 | 12798   | 52 | + |
| 104 | 11485 B | 50 | + |
| 103 | 11843 A | 47 | + |
| 102 | 12853   | 44 | + |
| 101 | 12502   | 44 | + |
| 100 | 11255   | 39 | + |
| 99  | 12343   | 39 | + |
| 98  | 12292   | 39 | + |
| 97  | 11613   | 36 | + |
| 96  | 12803   | 36 | + |
| 95  | 11252   | 33 | + |
| 94  | 12868   | 31 | + |
| 93  | 12922   | 29 | + |
| 92  | 12533   | 28 | + |
| 91  | 12970   | 27 | + |
| 90  | 11281   | 26 | + |
| 89  | 12614   | 25 | + |
| 88  | 12786   | 24 | + |
| 87  | 13067   | 24 | + |
| 86  | 12341   | 24 | + |
| 85  | 11355   | 23 | + |
| 84  | 12544   | 23 | + |
| 83  | 11332   | 22 | + |
| 82  | 11248   | 21 | + |
| 81  | 11465 B | 20 | + |
| 80  | 11376 A | 20 | + |
| 79  | 11677 A | 19 | + |
| 78  | 11325   | 19 | + |
| 77  | 11443 A | 18 | + |
| 76  | 13175   | 17 | + |
| 75  | 12351   | 17 | + |
| 74  | 13714 A | 16 | + |
| 73  | 12812   | 15 | + |
| 72  | 13003   | 14 | + |
| 71  | 11333 B | 14 | + |
| 70  | 12968   | 14 | + |
| 69  | 12344   | 13 | + |
| 68  | 12886   | 13 | + |
| 67  | 11266   | 12 | + |
| 66  | 12188   | 11 | + |
| 65  | 11842 A | 11 | + |
| 64  | 11834 A | 10 | + |

|              |         |   |   |
|--------------|---------|---|---|
| 63           | 11837 A | 9 | + |
| 62           | 12430   | 9 | + |
| 61           | 11891 A | 9 | + |
| 60           | 12817   | 8 | + |
| 59           | 11353 B | 8 | + |
| <b>_____</b> |         |   |   |
| 58           | 11829 A | - | - |
| 57           | 11660   | - | - |
| 56           | 12830   | - | - |
| 55           | 11320   | - | - |
| 54           | 11351 A | - | - |
| 53           | 11354   | - | - |
| 52           | 12869   | - | - |
| 51           | 12566   | - | - |
| 50           | 11884 A | - | - |
| 49           | 12753   | - | - |
| 48           | 11258   | - | - |
| 47           | 12800   | - | - |
| 46           | 13179   | - | - |
| 45           | 12126 A | - | - |
| 44           | 11364   | - | - |
| 43           | 12795   | - | - |
| 42           | 15395 A | - | - |
| 41           | 13191   | - | - |
| 40           | 11631 B | - | - |
| 39           | 12399   | - | - |
| 38           | 12159 B | - | - |
| 37           | 12345   | - | - |
| 36           | 11882 A | - | - |
| 35           | 11888 A | - | - |
| 34           | 11813 A | - | - |
| 33           | 11874 A | - | - |
| 32           | 11444 A | - | - |
| 31           | 11445 A | - | - |
| 30           | 11371 A | - | - |
| 29           | 11367 B | - | - |
| 28           | 11368 B | - | - |
| 27           | 11260   | - | - |
| 26           | 11348 A | - | - |
| 25           | 11343 A | - | - |
| 24           | 1340 A  | - | - |
| 23           | 11258   | - | - |
| 22           | 1335 C  | - | - |
| 21           | 11349 A | - | - |
| 20           | 13172   | - | - |



|    |         |   |    |
|----|---------|---|----|
| 19 | 13173   | - | 1- |
| 18 | 13174   | - | -  |
| 17 | 13184   | - | -  |
| 16 | 12876   | - | -  |
| 15 | 12906   | - | -  |
| 14 | 13177   | - | -  |
| 13 | 13181   | - | -  |
| 12 | 12858   | - | -  |
| 11 | 12910   | - | -  |
| 10 | 12837   | - | -  |
| 9  | 13791   | - | -  |
| 8  | 12611   | - | -  |
| 7  | 11289   | - | -  |
| 6  | 11888 B | - | -  |
| 5  | 11352   | - | -  |
| 4  | 11335 d | - | -  |
| 3  | 11635 C | - | -  |
| 2  | 12339   | - | -  |
| 1  | 12368   | - | -  |

2  
3

1 **Table S1E** related to **Figure S1** and **Figure 3**.  
 2 **Characteristics of *H. pylori* ELISA-positive patients from UMAE Pediatría,**  
 3 **Mexico City, Mexico.**

4  
 5 The serum samples are displayed according to IT50s tested with *H. pylori* strain  
 6 17875/Leb. In addition, *H. pylori* strain J166 identified the series of IT50 titers as positive  
 7 (+) or negative (-). The location for the background level (the start of the positive IT50  
 8 sample is indicated by the horizontal bar) was calibrated with sera from ELISA-negative  
 9 individuals using *H. pylori* J166.

10

| #   | Serum Code | IT50      |      |
|-----|------------|-----------|------|
|     |            | 17875/Leb | J166 |
| 200 | 326        | 1651      | +    |
| 199 | 261        | 799       | +    |
| 198 | 150        | 581       | +    |
| 197 | 426        | 561       | +    |
| 196 | 15         | 552       | +    |
| 195 | 151        | 513       | +    |
| 194 | 10         | 488       | +    |
| 193 | 5          | 451       | +    |
| 192 | 24         | 413       | +    |
| 191 | 51         | 378       | +    |
| 190 | 119        | 374       | +    |
| 189 | 227        | 338       | +    |
| 188 | 300        | 313       | +    |
| 187 | 188        | 302       | +    |
| 186 | 220        | 300       | +    |
| 185 | 13         | 287       | +    |
| 184 | 431        | 274       | +    |
| 183 | 57         | 256       | +    |
| 182 | 174        | 247       | +    |
| 181 | 336        | 228       | +    |
| 180 | 422        | 214       | +    |
| 179 | 535        | 203       | +    |
| 178 | 56         | 193       | +    |
| 177 | 182        | 191       | +    |
| 176 | 263        | 190       | +    |
| 175 | 530        | 171       | +    |
| 174 | 372        | 168       | +    |
| 173 | 37         | 151       | +    |
| 172 | 250        | 151       | +    |
| 171 | 297        | 148       | +    |
| 170 | 125        | 148       | +    |
| 169 | 59         | 137       | +    |
| 168 | 395        | 136       | +    |

|     |     |     |   |
|-----|-----|-----|---|
| 167 | 353 | 131 | + |
| 166 | 140 | 125 | + |
| 165 | 451 | 122 | + |
| 164 | 278 | 120 | + |
| 163 | 264 | 115 | + |
| 162 | 158 | 115 | + |
| 161 | 175 | 114 | + |
| 160 | 106 | 113 | + |
| 159 | 2   | 108 | + |
| 158 | 21  | 107 | + |
| 157 | 553 | 107 | + |
| 156 | 23  | 105 | + |
| 155 | 401 | 104 | + |
| 154 | 468 | 100 | + |
| 153 | 444 | 95  | + |
| 152 | 456 | 92  | + |
| 151 | 204 | 91  | + |
| 150 | 11  | 82  | + |
| 149 | 228 | 77  | + |
| 148 | 591 | 74  | + |
| 147 | 27  | 74  | + |
| 146 | 31  | 73  | + |
| 145 | 235 | 71  | + |
| 144 | 407 | 67  | + |
| 143 | 14  | 66  | + |
| 142 | 434 | 66  | + |
| 141 | 344 | 66  | + |
| 140 | 543 | 65  | + |
| 139 | 531 | 62  | + |
| 138 | 539 | 62  | + |
| 137 | 130 | 60  | + |
| 136 | 552 | 59  | + |
| 135 | 9   | 57  | + |
| 134 | 145 | 57  | + |
| 133 | 371 | 56  | + |
| 132 | 237 | 54  | + |
| 131 | 6   | 54  | + |
| 130 | 284 | 52  | + |
| 129 | 615 | 51  | + |
| 128 | 134 | 50  | + |
| 127 | 43  | 49  | + |
| 126 | 36  | 49  | + |
| 125 | 29  | 49  | + |
| 124 | 576 | 48  | + |
| 123 | 593 | 47  | + |

|     |     |    |   |
|-----|-----|----|---|
| 122 | 419 | 45 | + |
| 121 | 437 | 42 | + |
| 120 | 44  | 40 | + |
| 119 | 206 | 38 | + |
| 118 | 608 | 37 | + |
| 117 | 339 | 37 | + |
| 116 | 574 | 36 | + |
| 115 | 415 | 36 | + |
| 114 | 219 | 36 | + |
| 113 | 541 | 35 | + |
| 112 | 379 | 32 | + |
| 111 | 449 | 31 | + |
| 110 | 32  | 31 | + |
| 109 | 238 | 31 | + |
| 108 | 41  | 30 | + |
| 107 | 421 | 30 | + |
| 106 | 521 | 29 | + |
| 105 | 397 | 29 | + |
| 104 | 240 | 29 | + |
| 103 | 208 | 28 | + |
| 102 | 439 | 27 | + |
| 101 | 454 | 27 | + |
| 100 | 194 | 27 | + |
| 99  | 193 | 26 | + |
| 98  | 184 | 25 | + |
| 97  | 54  | 25 | + |
| 96  | 393 | 25 | + |
| 95  | 40  | 24 | + |
| 94  | 296 | 24 | + |
| 93  | 469 | 24 | + |
| 92  | 400 | 23 | + |
| 91  | 467 | 22 | + |
| 90  | 257 | 21 | + |
| 89  | 77  | 21 | + |
| 88  | 465 | 21 | + |
| 87  | 442 | 20 | + |
| 86  | 241 | 20 | + |
| 85  | 355 | 20 | + |
| 84  | 446 | 20 | + |
| 83  | 52  | 20 | + |
| 82  | 579 | 19 | + |
| 81  | 95  | 19 | + |
| 80  | 211 | 19 | + |
| 79  | 558 | 18 | + |
| 78  | 259 | 18 | + |

|    |     |    |   |
|----|-----|----|---|
| 77 | 580 | 18 | + |
| 76 | 271 | 18 | + |
| 75 | 50  | 17 | + |
| 74 | 403 | 17 | + |
| 73 | 181 | 17 | + |
| 72 | 45  | 16 | + |
| 71 | 63  | 16 | + |
| 70 | 239 | 16 | + |
| 69 | 3   | 16 | + |
| 68 | 409 | 15 | + |
| 67 | 177 | 15 | + |
| 66 | 131 | 14 | + |
| 65 | 248 | 14 | + |
| 64 | 440 | 14 | + |
| 63 | 112 | 13 | + |
| 62 | 331 | 13 | + |
| 61 | 390 | 13 | + |
| 60 | 550 | 13 | + |
| 59 | 33  | 12 | + |
| 58 | 163 | 12 | + |
|    |     |    |   |
| 57 | 582 | -  | - |
| 56 | 35  | -  | - |
| 55 | 528 | -  | - |
| 54 | 286 | -  | - |
| 53 | 7   | -  | - |
| 52 | 602 | -  | - |
| 51 | 49  | -  | - |
| 50 | 78  | -  | - |
| 49 | 26  | -  | - |
| 48 | 450 | -  | - |
| 47 | 38  | -  | - |
| 46 | 542 | -  | - |
| 45 | 162 | -  | - |
| 44 | 525 | -  | - |
| 43 | 522 | -  | - |
| 42 | 122 | -  | - |
| 41 | 34  | -  | - |
| 40 | 387 | -  | - |
| 39 | 267 | -  | - |
| 38 | 55  | -  | - |
| 37 | 62  | -  | - |
| 36 | 466 | -  | - |
| 35 | 48  | -  | - |
| 34 | 583 | -  | - |

|    |     |   |   |
|----|-----|---|---|
| 33 | 53  | - | - |
| 32 | 66  | - | - |
| 31 | 159 | - | - |
| 30 | 600 | - | - |
| 29 | 25  | - | - |
| 28 | 599 | - | - |
| 27 | 30  | - | - |
| 26 | 545 | - | - |
| 25 | 39  | - | - |
| 24 | 47  | - | - |
| 23 | 554 | - | - |
| 22 | 592 | - | - |
| 21 | 58  | - | - |
| 20 | 544 | - | - |
| 19 | 20  | - | - |
| 18 | 609 | - | - |
| 17 | 399 | - | - |
| 16 | 8   | - | - |
| 15 | 17  | - | - |
| 14 | 60  | - | - |
| 13 | 294 | - | - |
| 12 | 4   | - | - |
| 11 | 12  | - | - |
| 10 | 18  | - | - |
| 9  | 19  | - | - |
| 8  | 22  | - | - |
| 7  | 28  | - | - |
| 6  | 129 | - | - |
| 5  | 142 | - | - |
| 4  | 144 | - | - |
| 3  | 270 | - | - |
| 2  | 327 | - | - |
| 1  | 380 | - | - |

1  
2  
3

1 **Table S1F related to Figure 1.**  
 2 **Characteristics of *H. pylori* ELISA-positive patients from Regional Children**  
 3 **Hospital and St. Zinaida City Children Hospital, Sumy, Ukraine.**  
 4

| #  | Serum Code | Age | IT50<br>17875/Leb |
|----|------------|-----|-------------------|
| 36 | UA-206     | 9   | 7100              |
| 35 | UA-327     | 15  | 717               |
| 34 | UA-292     | 17  | 546               |
| 33 | UA-308     | 17  | 338               |
| 32 | UA-238     | 15  | 253               |
| 31 | UA-266     | 5   | 243               |
| 30 | UA-236     | 15  | 208               |
| 29 | UA-280     | 9   | 141               |
| 28 | UA-247     | 14  | 120               |
| 27 | UA-307     | 9   | 86                |
| 26 | UA-319     | 14  | 75                |
| 25 | UA-318     | 7   | 74                |
| 24 | UA-290     | 9   | 51                |
| 23 | UA-223     | 7   | 50                |
| 22 | UA-331     | 13  | 24                |
| 21 | UA-310     | 11  | 15                |
| 20 | UA-303     | 14  | 8                 |
|    |            |     |                   |
| 19 | UA-203     | 7   | -                 |
| 18 | UA-205     | 4   | -                 |
| 17 | UA-220     | 3   | -                 |
| 16 | UA-243     | 15  | -                 |
| 15 | UA-245     | 16  | -                 |
| 14 | UA-276     | 7   | -                 |
| 13 | UA-289     | 9   | -                 |
| 12 | UA-296     | 17  | -                 |
| 11 | UA-305     | 15  | -                 |
| 10 | UA-306     | 17  | -                 |
| 9  | UA-309     | 13  | -                 |
| 8  | UA-311     | 8   | -                 |
| 7  | UA-316     | 13  | -                 |
| 6  | UA-321     | 13  | -                 |
| 5  | UA-322     | 15  | -                 |
| 4  | UA-324     | 16  | -                 |
| 3  | UA-328     | 17  | -                 |
| 2  | UA-332     | 17  | -                 |
| 1  | UA-335     | 17  | -                 |

5

1 **Table S2A** related to **Figure 3A**.  
 2 **Leb-binding affinities of Swedish strains.**  
 3

| Diagnosis | Strain   | Ka Leb         |
|-----------|----------|----------------|
| Gastritis | Sw62     | _ <sup>a</sup> |
|           | Sw3      | _ <sup>a</sup> |
|           | Sw10     | _ <sup>a</sup> |
|           | Sw11     | _ <sup>a</sup> |
|           | Sw15     | _ <sup>a</sup> |
|           | Sw29     | _ <sup>a</sup> |
|           | Sw56     | _ <sup>a</sup> |
|           | Sw57     | _ <sup>a</sup> |
|           | Sw67     | _ <sup>a</sup> |
|           | Sw69     | _ <sup>a</sup> |
|           | Sw125    | _ <sup>a</sup> |
|           | Sw58     | _ <sup>a</sup> |
|           | Sw70     | _ <sup>a</sup> |
|           | Sw77     | _ <sup>a</sup> |
|           | Sw79     | _ <sup>a</sup> |
|           | Sw80     | _ <sup>a</sup> |
|           | Sw86     | _ <sup>a</sup> |
|           | Sw123    | _ <sup>a</sup> |
|           | Sw82     | _ <sup>a</sup> |
|           | Sw84     | 6.84E+08       |
|           | Sw114    | 9.37E+08       |
|           | Sw76     | 1.00E+09       |
|           | Sw59     | 1.04E+09       |
|           | Sw72     | 1.55E+09       |
|           | Sw116    | 1.65E+09       |
|           | Sw60     | 2.41E+09       |
|           | Sw47     | 2.72E+09       |
|           | Sw78     | 3.05E+09       |
| Sw65      | 3.09E+09 |                |
| Sw75      | 3.19E+09 |                |
| Sw119     | 4.09E+09 |                |
| Sw117     | 4.35E+09 |                |



|      |          |               |
|------|----------|---------------|
|      | Sw81     | 7.38E+09      |
|      | Sw42     | 1.22E+10      |
|      | Sw115    | 2.23E+10      |
|      | Sw87     | 2.25E+10      |
|      | Sw66     | 2.63E+10      |
|      | Sw4      | 2.74E+10      |
|      | Sw68     | 3.04E+10      |
|      | Sw89     | 4.11E+10      |
|      | Sw61     | 5.44E+10      |
|      | Sw126    | 5.84E+10      |
|      | Sw27     | 6.54E+10      |
|      | Sw127    | 6.57E+10      |
|      | Sw64     | 8.41E+10      |
|      | Sw63     | 1.75E+11      |
| DU   | Sw1      | <sup>-a</sup> |
|      | Sw20     | <sup>-a</sup> |
|      | Sw52     | <sup>-a</sup> |
|      | Sw31     | <sup>-a</sup> |
|      | Sw50     | 2.18E+08      |
|      | Sw13     | 4.47E+09      |
|      | Sw24     | 9.17E+09      |
|      | Sw51     | 1.04E+10      |
|      | Sw39     | 1.55E+10      |
|      | Sw30     | 2.32E+10      |
|      | Sw45     | 3.04E+10      |
|      | Sw54     | 3.14E+10      |
|      | Sw43     | 3.23E+10      |
|      | Sw18     | 4.92E+10      |
|      | Sw7      | 5.44E+10      |
|      | Sw38     | 9.21E+10      |
|      | Sw44     | 1.04E+11      |
| Sw53 | 1.58E+11 |               |
| Sw5  | 1.66E+11 |               |

- 1 <sup>-a</sup> Ka data are missing because the strain does not produce detectable Leb binding.
- 2 Leb binding affinities of Swedish *H. pylori* strains are described in <sup>11</sup>.

1 **Table S2B** related to **Figure S1G (Leb-Cocktail)** and **Figure S3A (Leb-Hot)**.  
 2 **Leb-binding properties of Mexican strains and corresponding serum IT50s.**

| Diagnosis | Strain | Leb-Hot, % | Leb-Cocktail, % | Serum Code | Serum IT50      |
|-----------|--------|------------|-----------------|------------|-----------------|
| Gastritis | Mc1201 | 19         | 8               | 386        | 1               |
|           | Mc1205 | 77         | 1               | 203        | 1               |
|           | Mc1207 | 30         | 10              | 21         | 116             |
|           | Mc1215 | 41         | 3               | 171        | 70              |
|           | Mc1216 | 76         | 29              | 110        | 1               |
|           | Mc1217 | 84         | 24              | 68         | 39              |
|           | Mc1218 | 82         | 12              | 79         | 59              |
|           | Mc1219 | 5          | 2               | 31         | 16              |
|           | Mc1221 | 52         | 20              | 345        | 64              |
|           | Mc1222 | 0          | 0               | 12         | 1               |
|           | Mc1223 | 0          | 0               | 22         | ND <sup>a</sup> |
|           | Mc1227 | 80         | 41              | 75         | 4               |
|           | Mc1229 | 3          | 1               | 217        | 107             |
|           | Mc1230 | 1          | 0               | 566        | 92              |
|           | Mc1231 | 69         | 29              | 68         | 39              |
|           | Mc1236 | 80         | 21              | 747        | ND <sup>a</sup> |
| DU        | Mc1202 | 84         | 18              | 419        | 50              |
|           | Mc1203 | 47         | 2               | 1045       | 1               |
|           | Mc1204 | 86         | 31              | 902        | 89              |
|           | Mc1206 | 30         | 1               | 1040       | 7               |
|           | Mc1208 | 63         | 28              | 415        | 43              |
|           | Mc1209 | 74         | 40              | 798        | 98              |
|           | Mc1210 | 86         | 53              | 465        | 27              |
|           | Mc1211 | 86         | 67              | 979        | 84              |
|           | Mc1212 | 47         | 2               | 899        | 1               |
|           | Mc1213 | 85         | 24              | 1075       | 28              |
|           | Mc1214 | 70         | 34              | 1038       | 118             |
|           | Mc1220 | 63         | 24              | 70         | 46              |
|           | Mc1224 | 1          | 0.5             | 918        | 1               |
|           | Mc1225 | 1          | 0.3             | 1070       | 1               |
| Mc1226    | 1      | 0.5        | 1085            | 127        |                 |
| Mc1228    | 72     | 17         | 372             | 193        |                 |

3 ND<sup>a</sup> - IT50 is **Not Defined (LOW)**

1 **Table S3** related to **Figure 3** and **Figure S3**.  
 2 **Sera IT50 from Non-Atrophic Gastritis (NAG) and Duodenal Ulcer disease (DU)**  
 3 **patients.**  
 4

| Serum Code | Diagnosis  | ELISA<br><i>H. pylori</i> | IT50 by different test-strains |        |      |        |        |      |     | no. of<br>blue boxes |   |
|------------|------------|---------------------------|--------------------------------|--------|------|--------|--------|------|-----|----------------------|---|
|            |            |                           | 17875/Leb                      | Mc1204 | J166 | Mc1207 | Mc1215 | Sw44 | I9  |                      |   |
| 201-14     | <b>NAG</b> | 3.5                       | 34                             | 69     | 234  | 386    | 103    | 75   | 127 | 5                    |   |
| 201-84     | <b>NAG</b> | 2.1                       | 208                            | 118    | 424  | 509    | 344    | 141  | 9   | 381                  | 5 |
| 201-99     | <b>NAG</b> | 1.9                       | 46                             | 33     | 64   | 96     | 49     | 73   | 75  | 5                    |   |
| 201-113    | <b>NAG</b> | 6.0                       | 1                              | 5      | 31   | 37     | 26     | 1    |     | 0                    |   |
| 201-118    | <b>NAG</b> | 3.3                       | 31                             | 14     | 40   | 52     | 43     | 8    | 8   | 2                    |   |
| 201-137    | <b>NAG</b> | 10.8                      | 135                            | 151    | 555  | 1494   | 482    | 180  |     | 5                    |   |
| 201-143    | <b>NAG</b> | 2.2                       | 38                             | 35     | 266  | 178    | 12     | 51   |     | 4                    |   |
| 201-352    | <b>NAG</b> | 7.2                       | 1                              | 1      | 1    | 43     | 15     | 1    | 8   | 0                    |   |
| 201-406    | <b>NAG</b> | 12.8                      | 44                             | 590    | 2285 | 1221   | 413    | 721  |     | 5                    |   |
| 201-464    | <b>NAG</b> | 2.7                       | 34                             | 80     | 351  | 399    | 155    | 78   |     | 5                    |   |
| 201-526    | <b>NAG</b> | 1.2                       | 1                              | 17     | 91   | 473    | 90     | 7    |     | 5                    |   |
| 201-537    | <b>NAG</b> | 1.0                       | 1                              | 12     | 35   | 58     | 27     | 1    | 32  | 1                    |   |
| 201-540    | <b>NAG</b> | 2.1                       | 1                              | 6      | 44   | 46     | 10     | 1    | 1   | 0                    |   |
| 201-560    | <b>NAG</b> | 5.1                       | 37                             | 51     | 73   | 160    | 218    | 25   |     | 5                    |   |
| 201-568    | <b>NAG</b> | 7.8                       | 34                             | 68     | 441  | 1203   | 197    | 86   |     | 5                    |   |
| 5          | <b>NAG</b> | 5.2                       | 282                            | 106    | 198  | 1515   | 733    | 343  |     | 5                    |   |
| 10         | <b>NAG</b> | 9.8                       | 1                              | 2      | 27   | 27     | 42     | 1    | 9   | 1                    |   |
| 12         | <b>NAG</b> | 1.2                       | 1                              | 22     | 8    | 23     | 8      | 1    | 5   | 0                    |   |
| 15         | <b>NAG</b> | 3.3                       | 337                            | 794    | 2019 | 541    | 998    | 294  |     | 5                    |   |
| 21         | <b>NAG</b> | 7.8                       | 116                            | 143    | 501  | 916    | 291    | 153  |     | 5                    |   |
| 31         | <b>NAG</b> | 4.0                       | 16                             | 15     | 70   | 171    | 62     | 56   |     | 5                    |   |
| 51         | <b>NAG</b> | 3.8                       | 277                            | 93     | 680  | 1015   | 662    | 264  |     | 5                    |   |
| 68         | <b>NAG</b> | 5.7                       | 39                             | 51     | 267  | 214    | 39     | 34   |     | 5                    |   |
| 75         | <b>NAG</b> | 1.7                       | 4                              | 7      | 13   | 355    | 11     | 12   | 77  | 3                    |   |
| 79         | <b>NAG</b> | 1.0                       | 59                             | 74     | 243  | 637    | 246    | 71   |     | 5                    |   |
| 110        | <b>NAG</b> | 0.9                       | 1                              | 2      | 12   | 12     | 8      | 1    | 3   | 0                    |   |
| 146        | <b>NAG</b> | 1.5                       | 2                              | 16     | 85   | 72     | 15     | 1    | 14  | 2                    |   |
| 160        | <b>NAG</b> | 6.5                       | 82                             | 54     | 310  | 355    | 365    | 232  |     | 5                    |   |
| 171        | <b>NAG</b> | 1.2                       | 70                             | 264    | 1106 | 742    | 203    | 298  |     | 5                    |   |

|      |            |      |     |     |      |      |     |     |     |   |
|------|------------|------|-----|-----|------|------|-----|-----|-----|---|
| 176  | <b>NAG</b> | 2.8  | 25  | 20  | 430  | 71   | 132 | 69  | 65  | 5 |
| 203  | <b>NAG</b> | 5.5  | 1   | 4   | 60   | 13   | 1   | 1   | 4   | 1 |
| 217  | <b>NAG</b> | 4.8  | 107 | 45  | 839  | 794  | 230 | 29  |     | 5 |
| 345  | <b>NAG</b> | 3.7  | 64  | 43  | 142  | 602  | 252 | 1   |     | 4 |
| 386  | <b>NAG</b> | 4.4  | 1   | 9   | 107  | 147  | 41  | 1   | 57  | 4 |
| 566  | <b>NAG</b> | 1.3  | 92  | 204 | 3167 | 145  | 230 | 189 |     | 5 |
| 372  | <b>DU</b>  | 9.6  | 193 | 416 | 2139 | 543  | 324 | 115 |     | 5 |
| 70   | <b>DU</b>  | 3.9  | 46  | 33  | 407  | 348  | 106 | 98  |     | 5 |
| 415  | <b>DU</b>  | 4.6  | 43  | 51  | 358  | 303  | 391 | 36  |     | 5 |
| 419  | <b>DU</b>  | 4.4  | 50  | 144 | 1263 | 54   | 55  | 37  | 224 | 5 |
| 439  | <b>DU</b>  | 9.4  | 28  | 94  | 507  | 217  | 357 | 104 |     | 5 |
| 465  | <b>DU</b>  | 11.1 | 27  | 112 | 400  | 210  | 55  | 28  |     | 5 |
| 522  | <b>DU</b>  | 0.7  | 1   | 3   | 26   | 36   | 21  | 1   | 7   | 0 |
| 767  | <b>DU</b>  | 2.1  | 22  | 10  | 71   | 62   | 17  | 1   | 35  | 3 |
| 776  | <b>DU</b>  | 4.1  | 1   | 1   | 45   | 24   | 22  | 1   | 1   | 0 |
| 790  | <b>DU</b>  | 3.8  | 102 | 19  | 145  | 1193 | 212 | 482 |     | 5 |
| 798  | <b>DU</b>  | 1.0  | 98  | 84  | 589  | 527  | 208 | 177 |     | 5 |
| 899  | <b>DU</b>  | 0.4  | 1   | 1   | 18   | 23   | 14  | 1   | 33  | 0 |
| 902  | <b>DU</b>  | 0.5  | 89  | 499 | 1021 | 651  | 534 | 202 |     | 5 |
| 903  | <b>DU</b>  | 0.5  | 1   | 5   | 107  | 50   | 1   | 1   | 29  | 3 |
| 904  | <b>DU</b>  | 0.7  | 1   | 4   | 38   | 63   | 9   | 1   | 20  | 1 |
| 906  | <b>DU</b>  | 0.6  | 1   | 4   | 43   | 33   | 19  | 1   | 6   | 0 |
| 913  | <b>DU</b>  | 0.6  | 1   | 2   | 25   | 30   | 45  | 1   | 8   | 1 |
| 918  | <b>DU</b>  | 1.3  | 1   | 9   | 99   | 89   | 12  | 7   | 53  | 4 |
| 919  | <b>DU</b>  | 1.0  | 28  | 43  | 921  | 365  | 46  | 93  |     | 5 |
| 920  | <b>DU</b>  | 1.3  | 1   | 1   | 13   | 17   | 27  | 1   |     | 0 |
| 921  | <b>DU</b>  | 9.6  | 47  | 26  | 299  | 319  | 57  | 62  |     | 5 |
| 938  | <b>DU</b>  | 0.3  | 1   | 217 | 415  | 514  | 61  | 167 |     | 5 |
| 958  | <b>DU</b>  | 2.4  | 5   | 15  | 141  | 224  | 1   | 16  |     | 4 |
| 960  | <b>DU</b>  | 3.7  | 31  | 14  | 39   | 182  | 24  | 29  |     | 3 |
| 979  | <b>DU</b>  | 6.7  | 84  | 8   | 186  | 90   | 176 | 25  | 98  | 5 |
| 983  | <b>DU</b>  | 0.5  | 1   | 1   | 9    | 28   | 16  | 1   | 10  | 0 |
| 994  | <b>DU</b>  | 0.6  | 45  | 42  | 388  | 1163 | 261 | 119 |     | 5 |
| 995  | <b>DU</b>  | 4.3  | 1   | 15  | 60   | 65   | 34  | 17  | 34  | 5 |
| 1008 | <b>DU</b>  | 0.8  | 27  | 41  | 167  | 50   | 128 | 59  | 98  | 5 |
| 1010 | <b>DU</b>  | 6.4  | 1   | 7   | 130  | 36   | 52  | 1   | 3   | 3 |
| 1019 | <b>DU</b>  | 1.3  | 1   | 3   | 62   | 64   | 32  | 1   | 29  | 3 |
| 1034 | <b>DU</b>  | 1.6  | 1   | 1   | 12   | 20   | 33  | 1   | 1   | 1 |

|      |    |     |                       |     |           |           |           |          |           |   |
|------|----|-----|-----------------------|-----|-----------|-----------|-----------|----------|-----------|---|
| 1038 | DU | 1.2 | 118                   | 114 | 186       | 646       | 242       | 256      |           | 5 |
| 1040 | DU | 1.3 | 7                     | 30  | 160       | 113       | 93        | 1        | 84        | 4 |
| 1041 | DU | 0.8 | 4                     | 57  | 164       | 56        | 405       | 22       | 265       | 5 |
| 1045 | DU | 0.5 | 1                     | 2   | 56        | 104       | 45        | 1        | 13        | 4 |
| 1062 | DU | 3.0 | 231                   | 348 | 882       | 631       | 367       | 322      |           | 5 |
| 1066 | DU | 1.0 | 1                     | 7   | 35        | 58        | 19        | 7        | 23        | 2 |
| 1069 | DU | 2.1 | 1                     | 1   | 11        | 42        | 8         | 1        | 7         | 0 |
| 1070 | DU | 2.3 | 1                     | 12  | 338       | 44        | 22        | 1        | 61        | 2 |
| 1074 | DU | 2.0 | 1                     | 14  | 165       | 55        | 34        | 1        | 55        | 4 |
| 1075 | DU | 3.3 | 28                    | 178 | 569       | 255       | 91        | 190      |           | 5 |
| 1085 | DU | 3.8 | 127                   | 353 | 479       | 1031      | 368       | 64       |           | 5 |
| 1086 | DU | 1.3 | 1                     | 4   | 7         | 26        | 28        | 1        | 4         | 0 |
|      |    |     | <b>Positive IT50:</b> |     | <b>50</b> | <b>50</b> | <b>28</b> | <b>2</b> | <b>33</b> |   |

1  
2  
3 Explanation for the column “No. of (blue) boxes”. The IT50 titers for 17875/Leb and  
4 Mc1204 are considered positive if two or more of the five reporter strains (**J166, Mc1207,**  
5 **Mc1215, Sw 44,** and **I9**) are positive (indicated by blue color) for IT50. If only a single  
6 reporter strain is positive and the rest are negative (yellow) or all reporter strains are  
7 negative (yellow), the serum is considered negative for IT50 and is not included in the  
8 Odds Ratio calculations. Those sera are indicated with a full yellow stripe.  
9  
10 There are 8 sera samples that are IT50 negative in the NAG cluster, compared to 11 IT50-  
11 negative sera samples in the DU cluster, which corresponds to 23% and 25%,  
12 respectively.  
13  
14 In the 17875/Leb column and the Mc1204 column, the sera that demonstrate IT50 <30  
15 are colored red (LOW), whereas the sera samples with IT50 >30 are colored green  
16 (HIGH). The IT50 = 30 critical value was defined from the comparison of all possible odds  
17 ratios, see **Figure 3C**.  
18  
19 The ratio between High and Low for the NAG vs. DU sera samples was used to assess  
20 the Odds Ratio. There were 21 vs. 6 (a 3.5-fold difference) sera samples with IT50 higher  
21 vs. lower than 30 among NAG patients, compared to 14 vs. 19 (a 0.74-fold difference) for  
22 DU patients, which generated the Odds Risk as  $3.5/0.74 = 4.75$  (**Figure 3Di**).  
23

1 **Table S4** related to **Figure 1** and **Figure S1** and **Figure 3E**.

2  
3 **The locations of the IT50 = 30 interval in the different cohorts were identified by**  
4 **strain 17875/Leb, whereas the locations of IT50 positive vs. negative sera in the**  
5 **different cohorts were identified by strain J166.**  
6  
7  
8

| #1           | #2                                | #3                                   | #4                                            | #5                           | #6                                       | #7                        |
|--------------|-----------------------------------|--------------------------------------|-----------------------------------------------|------------------------------|------------------------------------------|---------------------------|
| Serum Series | Number of individual sera samples | Serum no. for the IT50 = 30 interval | Serum no. in the middle of IT50 = 30 interval | Serum samples with IT50 > 30 | Sera no. for the IT50 -positive interval | IT50-positive individuals |
| Kalixanda    | 322                               | 180 - 189                            | 184                                           | 43%                          | 54 - 322                                 | 84%                       |
| Ukraine      | 79                                | 52 - 56                              | 54                                            | 33%                          | 36 - 79                                  | 56%                       |
| USA          | 141                               | 94 - 98                              | 96                                            | 33%                          | 59 - 141                                 | 59%                       |
| Mexico       | 200                               | 131 - 139                            | 135                                           | 33%                          | 58 - 200                                 | 72%                       |
| Referred to: | <b>Table S1</b>                   | <b>Figure 3E</b>                     | <b>Figure 3E</b>                              | <b>Figure 3E</b>             | <b>Table S1</b>                          |                           |

9  
10 Column #1: IT50s were tested by sera samples from four world-wide populations  
11 (all data in **Table S1**)  
12 Column #2: The number of individual sera samples from each population.  
13 Column #3: The sera sample numbers corresponding to the IT50 = 30 interval, i.e.,  
14 IT50 < 30 in samples 1–179 and IT50 > 30 in samples 190–322 in the  
15 Kalixanda cohort.  
16 Column #4: The sera sample indicates the mid sample of the IT50 = 30 interval  
17 from Column 3.  
18 Column #5: The prevalence of serum samples with IT50 > 30, e.g., samples no. 184–  
19 322 out of the 322 samples (43%) in the Kalixanda cohort.  
20 Column #6: The sera samples that are positive for IT50 after testing with the  
21 sensitive low-affinity Leb-binding strain J166.  
22 Column #7: The group of individuals (in %) that are IT50 positive (from Column 6).  
23  
24  
25

1 **Table 5** related to **Fig 5** and **Figure S5**  
2 Crystallographic data collection and refinement statistics for the BabA protein  
3 co-crystallized with ABbA (**Table 5**).  
4

|                                                     | <b>BabA<sup>AD</sup>-Nb19-ABBA</b> |
|-----------------------------------------------------|------------------------------------|
| <b>Data collection</b>                              |                                    |
| Space group                                         | P 1 2 <sub>1</sub> 1               |
| Cell dimensions                                     |                                    |
| <i>a, b, c</i> (Å)                                  | 99.7, 68.4, 176.6                  |
| <i>α, β, γ</i> (°)                                  | 90.0, 104.4, 90.0                  |
| Resolution (Å)                                      | 39.45-2.70 (2.77-2.70)*            |
| <i>R</i> <sub>meas</sub>                            | 6.0 (88.4)*                        |
| <i>I</i> / <i>σI</i>                                | 15.1 (2.1)*                        |
| CC1/2                                               | 99.9 (86.4)*                       |
| Completeness (%)                                    | 99.2 (99.3)*                       |
| Redundancy                                          | 4.3 (4.5)*                         |
| <b>Refinement</b>                                   |                                    |
| Resolution (Å)                                      | 39.5-2.7                           |
| No. reflections                                     | 63297                              |
| <i>R</i> <sub>work</sub> / <i>R</i> <sub>free</sub> | 22.9 / 28.3                        |
| No. atoms                                           |                                    |
| Protein                                             | 13995                              |
| Water                                               | 4                                  |
| B-factors                                           |                                    |
| Protein                                             | 110.6                              |
| Water                                               | 95.5                               |
| R.m.s deviations                                    |                                    |
| Bond lengths (Å)                                    | 0.01                               |
| Bond angles (°)                                     |                                    |

5

- 1 **Table S6A** related to **Fig 6** and **fig S6**.
- 2 Binding properties and IC50 of Eurasian *H. pylori* strains.
- 3 S831, I109, and I119 are marked in red as the Specialists among 49 European and 27
- 4 Asian strains.
- 5

| Origin        | #  | Strain           | Leb-Hot (%) | ABbA-Hot (%) | IC50, nM |
|---------------|----|------------------|-------------|--------------|----------|
| <b>Europe</b> | 1  | <b>17875/Leb</b> | 92          | 90           | 0.1      |
|               | 2  | <b>J166</b>      | 33          | 1            | 25       |
|               | 3  | <b>USU101</b>    | 78          | 12           | 0.4      |
| <b>Sweden</b> | 1  | <b>Sw2</b>       | 94          | 54           | 0.1      |
|               | 2  | <b>Sw4</b>       | 61          | 0.2          | 7        |
|               | 3  | <b>Sw6</b>       | 73          | 54           | 0.03     |
|               | 4  | <b>Sw7</b>       | 38          | 37           | 0.1      |
|               | 5  | <b>Sw8</b>       | 91          | 83           | 0.05     |
|               | 6  | <b>Sw17</b>      | 96          | 1            | 6        |
|               | 7  | <b>Sw19</b>      | 76          | 14           | 0.4      |
|               | 8  | <b>Sw21</b>      | 93          | 43           | 0.2      |
|               | 9  | <b>Sw27</b>      | 95          | 31           | 0.7      |
|               | 10 | <b>Sw38</b>      | 82          | 2            | 2        |
|               | 11 | <b>Sw41</b>      | 28          | 22           | 0.2      |
|               | 12 | <b>Sw43</b>      | 86          | 57           | 0.03     |
|               | 13 | <b>Sw44</b>      | 42          | 54           | 0.1      |
|               | 14 | <b>Sw45</b>      | 88          | 29           | 0.3      |
|               | 15 | <b>Sw53</b>      | 95          | 80           | 0.06     |
|               | 16 | <b>Sw60</b>      | 22          | 42           | 0.04     |
|               | 17 | <b>Sw61</b>      | 86          | 53           | 0.1      |
|               | 18 | <b>Sw63</b>      | 92          | 64           | 0.1      |
|               | 19 | <b>Sw64</b>      | 95          | 54           | 0.3      |
|               | 20 | <b>Sw65</b>      | 38          | 43           | 0.2      |
|               | 21 | <b>Sw66</b>      | 83          | 34           | 0.4      |
|               | 22 | <b>Sw68</b>      | 89          | 31           | 0.5      |
|               | 23 | <b>Sw75</b>      | 24          | 0.3          | 4        |
|               | 24 | <b>Sw89</b>      | 76          | 28           | 0.2      |
|               | 25 | <b>Sw99</b>      | 92          | 40           | 0.2      |
|               | 26 | <b>Sw103</b>     | 94          | 53           | 0.7      |



|                |    |              |    |    |      |
|----------------|----|--------------|----|----|------|
|                | 27 | <b>Sw105</b> | 87 | 68 | 0.05 |
|                | 28 | <b>Sw110</b> | 93 | 56 | 0.3  |
|                | 29 | <b>Sw126</b> | 91 | 51 | 0.2  |
| <b>Germany</b> | 1  | <b>G929</b>  | 77 | 48 | 0.1  |
|                | 2  | <b>G932</b>  | 89 | 61 | 0.1  |
|                | 3  | <b>G962</b>  | 95 | 73 | 0.3  |
|                | 4  | <b>G965</b>  | 95 | 65 | 0.2  |
| <b>Spain</b>   | 1  | <b>S808</b>  | 78 | 8  | 0.7  |
|                | 2  | <b>S819</b>  | 94 | 55 | 0.3  |
|                | 3  | <b>S828</b>  | 41 | 55 | 0.04 |
|                | 4  | <b>S830</b>  | 95 | 54 | 0.3  |
|                | 5  | <b>S831</b>  | 54 | 1  | >100 |
|                | 6  | <b>S845</b>  | 44 | 2  | 4    |
|                | 7  | <b>S847</b>  | 88 | 33 | 0.6  |
|                | 8  | <b>S851</b>  | 63 | 32 | 0.5  |
|                | 9  | <b>S855</b>  | 92 | 50 | 0.2  |
|                | 10 | <b>S860</b>  | 95 | 43 | 0.5  |
|                | 11 | <b>S863</b>  | 97 | 53 | 0.3  |
|                | 12 | <b>S864</b>  | 91 | 35 | 0.4  |
|                | 13 | <b>S865</b>  | 97 | 43 | 0.7  |
| <b>India</b>   | 1  | <b>I99</b>   | 23 | 2  | 1.6  |
|                | 2  | <b>I93</b>   | 74 | 2  | >100 |
|                | 3  | <b>I9</b>    | 74 | 38 | 0.38 |
|                | 4  | <b>I78</b>   | 30 | 2  | 12   |
|                | 5  | <b>I60</b>   | 81 | 5  | 4    |
|                | 6  | <b>I21</b>   | 87 | 2  | >100 |
|                | 7  | <b>I18</b>   | 92 | 39 | 0.3  |
|                | 8  | <b>I17</b>   | 74 | 2  | 6    |
|                | 9  | <b>I120</b>  | 75 | 29 | 1    |
|                | 10 | <b>I110</b>  | 94 | 28 | 0.1  |
|                | 11 | <b>I109</b>  | 75 | 2  | 4    |
|                | 12 | <b>I102</b>  | 17 | 1  | >100 |
|                | 13 | <b>I119</b>  | 52 | 10 | 0.3  |
| <b>China</b>   | 1  | <b>Ch1</b>   | 97 | 78 | 0.3  |

|              |    |             |    |    |      |
|--------------|----|-------------|----|----|------|
| <b>Japan</b> | 1  | <b>J503</b> | 96 | 46 | 1    |
|              | 2  | <b>J506</b> | 11 | 1  | >100 |
|              | 3  | <b>J507</b> | 94 | 2  | >100 |
|              | 4  | <b>J509</b> | 92 | 29 | 0.9  |
|              | 5  | <b>J511</b> | 36 | 55 | 0.06 |
|              | 6  | <b>J512</b> | 35 | 54 | 0.06 |
|              | 7  | <b>J513</b> | 96 | 4  | 72   |
|              | 8  | <b>J517</b> | 94 | 26 | 0.89 |
|              | 9  | <b>J519</b> | 87 | 62 | 0.04 |
|              | 10 | <b>J520</b> | 90 | 18 | 5    |
|              | 11 | <b>J531</b> | 92 | 2  | 15   |
|              | 12 | <b>J532</b> | 95 | 42 | 0.5  |
|              | 13 | <b>J533</b> | 94 | 66 | 0.08 |

- 1
- 2 Binding properties and IC50s of Eurasian *H. pylori* strains.
- 3 S831, I109, and I119 are marked in red as the Specialists
- 4 among 49 European and 27 Asian strains.

- 1 **Table S6B** related to **Fig 6** and **fig S6**.  
 2 Binding properties and preferences and IC50s of North and South Indigenous American  
 3 and Latin-American *H. pylori* strains.  
 4 Leb-H, % - binding to **H**ot HSA-Leb conjugate  
 5 Leb-C, % - binding to **C**ocktail-HSA-Leb conjugate  
 6 ALeb-C, % - binding to **C**ocktail-HSA-ALeb conjugate  
 7 ND - Not Determined  
 8 O - Specialists are the strains with a >2.5 ratio in Leb/ALeb binding <sup>11</sup>.  
 9 A - Specialists are the strains with a <0.4 ratio in Leb/ALeb binding <sup>11</sup>.  
 10

| Origin                 | #  | Strain         | Leb-H (%) | Leb-C (%) | ALeb-C (%) | ABO Preference | ABbA-Hot (%) | IC50, nM |
|------------------------|----|----------------|-----------|-----------|------------|----------------|--------------|----------|
| Alaska / North America | 1  | <b>A702</b>    | 97        | 37        | 26         | Generalist     | 41           | 1        |
|                        | 2  | <b>A703</b>    | 94        | 32        | 32         | Generalist     | 45           | 0.5      |
|                        | 3  | <b>A710</b>    | 91        | 36        | 38         | Generalist     | 0.3          | >100     |
|                        | 4  | <b>A712</b>    | 54        | 16        | 13         | Generalist     | 4            | 0.7      |
|                        | 5  | <b>A713</b>    | 24        | 6         | 2          | O-Specialist   | 6            | 0.7      |
|                        | 6  | <b>A714</b>    | 96        | 23        | 21         | Generalist     | 82           | 0.2      |
|                        | 7  | <b>A718</b>    | 16        | 0         | 16         | A-Specialist   | 0.5          | >100     |
|                        | 8  | <b>A723</b>    | 70        | 11        | 0          | O-Specialist   | 0.3          | >100     |
|                        | 9  | <b>A730</b>    | 26        | 6         | 19         | A-Specialist   | 19           | 0.3      |
|                        | 10 | <b>A733</b>    | 64        | 46        | 37         | Generalist     | 1            | 30       |
|                        | 11 | <b>A736</b>    | 94        | 34        | 30         | Generalist     | 0.7          | >100     |
| Mexico, Latin America  | 1  | <b>Mc 1201</b> | 22        | 12        | 0          | O-Specialist   | 0.3          | >100     |
|                        | 2  | <b>Mc 1202</b> | 95        | 15        | 12         | Generalist     | 0.4          | >100     |
|                        | 3  | <b>Mc 1203</b> | 53        | 2         | 2          | Generalist     | 21           | 0.2      |
|                        | 4  | <b>Mc 1204</b> | 97        | 38        | 33         | Generalist     | 3            | 2        |
|                        | 5  | <b>Mc 1205</b> | 87        | 3         | 0          | O-Specialist   | 0.5          | >100     |
|                        | 6  | <b>Mc 1206</b> | 34        | 2         | 2          | Generalist     | 18           | 0.3      |
|                        | 7  | <b>Mc 1207</b> | 34        | ND*       | ND         | ND             | 2            | 2        |
|                        | 8  | <b>Mc 1208</b> | 71        | 12        | 7          | Generalist     | 25           | >100     |
|                        | 9  | <b>Mc 1209</b> | 84        | 40        | 0          | O-Specialist   | 1            | >100     |
|                        | 10 | <b>Mc 1210</b> | 97        | 39        | 34         | Generalist     | 4            | 6        |
|                        | 11 | <b>Mc 1211</b> | 97        | ND        | ND         | ND             | 5            | 6        |
|                        | 12 | <b>Mc 1212</b> | 53        | 3         | 3          | Generalist     | 23           | 0.3      |
|                        | 13 | <b>Mc 1213</b> | 95        | 28        | 3          | O-Specialist   | 25           | 1        |
|                        | 14 | <b>Mc 1214</b> | 79        | 29        | 9          | O-Specialist   | 1            | 3        |

|                                    |    |                |    |    |    |              |     |      |
|------------------------------------|----|----------------|----|----|----|--------------|-----|------|
|                                    | 15 | <b>Mc 1215</b> | 46 | 2  | 1  | Generalist   | 37  | 0.08 |
|                                    | 16 | <b>Mc 1216</b> | 86 | 24 | 22 | Generalist   | 1   | 5    |
|                                    | 17 | <b>Mc 1217</b> | 95 | 16 | 1  | O-Specialist | 0.9 | >100 |
|                                    | 18 | <b>Mc 1218</b> | 92 | 16 | 5  | O-Specialist | 0.9 | >100 |
|                                    | 19 | <b>Mc 1219</b> | 6  | 2  | 0  | O-Specialist | 0.9 | >100 |
|                                    | 20 | <b>Mc 1220</b> | 71 | ND | ND | ND           | 0.7 | >100 |
|                                    | 21 | <b>Mc 1221</b> | 58 | ND | ND | ND           | 0.5 | >100 |
|                                    | 22 | <b>Mc 1227</b> | 80 | 42 | 0  | O-Specialist | 1.3 | 5    |
| <b>Peru,<br/>South<br/>America</b> | 1  | <b>P300</b>    | 91 | 23 | 0  | O-Specialist | 0.4 | >100 |
|                                    | 2  | <b>P302</b>    | 80 | 26 | 0  | O-Specialist | 0.5 | 43   |
|                                    | 3  | <b>P304</b>    | 61 | 14 | 0  | O-Specialist | 2.7 | 1    |
|                                    | 4  | <b>P306</b>    | 92 | 70 | 59 | Generalist   | 25  | 0.2  |
|                                    | 5  | <b>P308</b>    | 94 | 31 | 4  | O-Specialist | 10  | 47   |
|                                    | 6  | <b>P314</b>    | 94 | 40 | 5  | O-Specialist | 0.8 | >100 |
|                                    | 7  | <b>P315</b>    | 74 | 18 | 0  | O-Specialist | 0.7 | >100 |
|                                    | 8  | <b>P318</b>    | 97 | 53 | 0  | O-Specialist | 0.8 | >100 |
|                                    | 9  | <b>P320</b>    | 65 | 28 | 0  | O-Specialist | 1.2 | >100 |
|                                    | 10 | <b>P322</b>    | 98 | 46 | 36 | Generalist   | 36  | 0.2  |
|                                    | 11 | <b>P323</b>    | 43 | 20 | 11 | Generalist   | 16  | 0.4  |
|                                    | 12 | <b>P325</b>    | 88 | 16 | 1  | O-Specialist | 0.8 | >100 |
|                                    | 13 | <b>P326</b>    | 94 | 22 | 2  | O-Specialist | 22  | 0.2  |
|                                    | 14 | <b>P328</b>    | 91 | 38 | 34 | Generalist   | 8   | 2    |
|                                    | 15 | <b>P330</b>    | 95 | 28 | 0  | O-Specialist | 22  | 0.5  |
|                                    | 16 | <b>P331</b>    | 93 | 31 | 0  | O-Specialist | 0.4 | >100 |
|                                    | 17 | <b>P434</b>    | 92 | 40 | 31 | Generalist   | 47  | 0.1  |
|                                    | 18 | <b>P435</b>    | 40 | 16 | 0  | O-Specialist | 1.6 | 7    |
|                                    | 19 | <b>P436</b>    | 93 | 49 | 12 | O-Specialist | 0.7 | >100 |
|                                    | 20 | <b>P437</b>    | 81 | 15 | 8  | Generalist   | 0.7 | >100 |
|                                    | 21 | <b>P438</b>    | 72 | 19 | 7  | O-Specialist | 30  | 0.9  |
|                                    | 22 | <b>P439</b>    | 14 | 2  | 14 | A-Specialist | 0.3 | >100 |
|                                    | 23 | <b>P440</b>    | 58 | 32 | 25 | Generalist   | 0.3 | >100 |
|                                    | 24 | <b>P441</b>    | 88 | 42 | 3  | O-Specialist | 0.9 | >100 |
|                                    | 25 | <b>P442</b>    | 96 | 46 | 5  | O-Specialist | 0.5 | >100 |
|                                    | 26 | <b>P443</b>    | 61 | 12 | 0  | O-Specialist | 39  | 0.2  |

|    |             |    |    |    |              |     |      |
|----|-------------|----|----|----|--------------|-----|------|
| 27 | <b>P444</b> | 62 | 21 | 0  | O-Specialist | 11  | 0.6  |
| 28 | <b>P445</b> | 95 | 34 | 0  | O-Specialist | 17  | 1    |
| 29 | <b>P446</b> | 32 | 16 | 0  | O-Specialist | 6   | 1    |
| 30 | <b>P447</b> | 69 | 33 | 1  | O-Specialist | 5   | 3    |
| 31 | <b>P448</b> | 71 | 31 | 0  | O-Specialist | 0.1 | >100 |
| 32 | <b>P449</b> | 96 | 62 | 17 | O-Specialist | 0.3 | 3    |
| 33 | <b>P450</b> | 47 | 12 | 0  | O-Specialist | 0.3 | >100 |
| 34 | <b>P451</b> | 12 | 8  | 0  | O-Specialist | 0.7 | >100 |
| 35 | <b>P452</b> | 80 | 25 | 1  | O-Specialist | 0.1 | >100 |
| 36 | <b>P453</b> | 93 | 56 | 3  | O-Specialist | 4   | 8    |
| 37 | <b>P454</b> | 78 | 27 | 0  | O-Specialist | 34  | 0.4  |
| 38 | <b>P455</b> | 92 | 27 | 0  | O-Specialist | 1.5 | 3    |

1  
2

1 Table S7 related to Fig 6 and fig S6.  
 2 BabA alignment (aa185-247) according to ABbA binding strength.

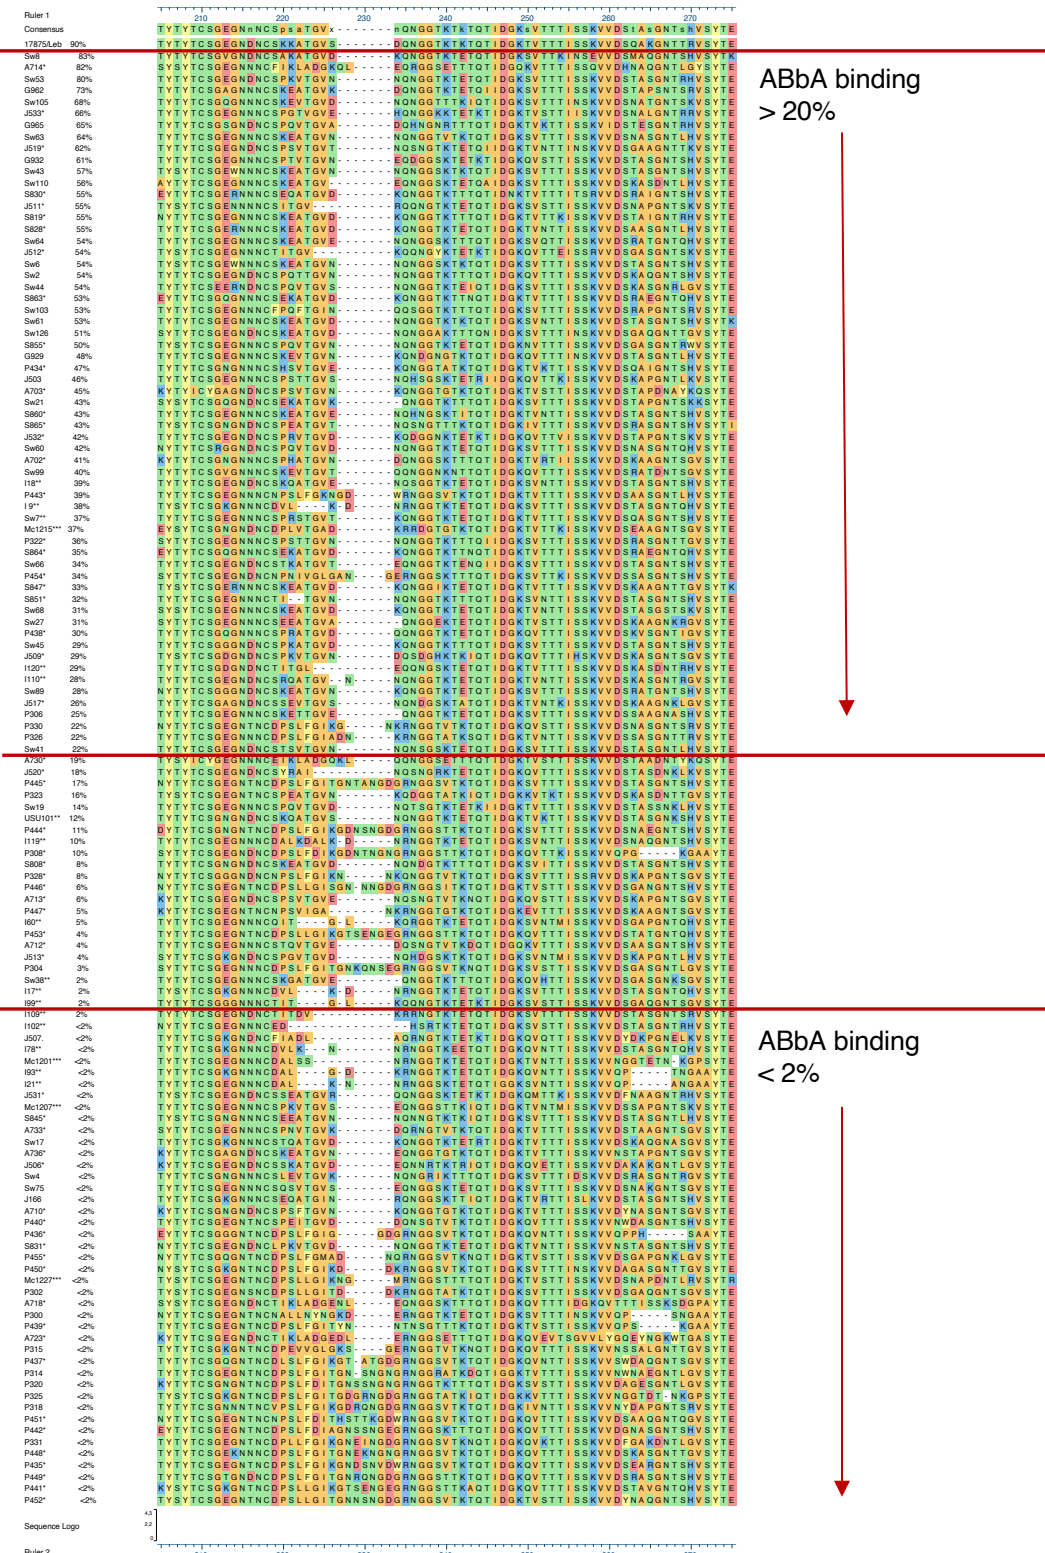

3

- 1 Sequences that originated from (11) are indicated by one star \*.
- 2 Sequences that originated from (14) are indicated by two stars \*\*.
- 3 Mexican Mc1201, Mc1207, Mc1215 and Mc1227 are indicated by three stars \*\*\*
- 4 and were sequenced by the J. Torres lab (co-author).
- 5

1 **Table S8** related to **Figure 6** and **Figure S6**.  
2 **ABbA binding properties of global *H. pylori* strains and of Generalist vs. Specialist**  
3 ***H. pylori* strains.**

4  
5 **Table S8A (Figure 6A)**

| ABbA binding (%) | European | Asian | Americas |
|------------------|----------|-------|----------|
| RIA, >20%        | 57.4     | 19.1  | 23.5     |
| RIA, <2%         | 11.5     | 13.5  | 75       |

6  
7 **Table S8B (Figure 6B)**

| ABbA binding (%) | Generalists | Specialists |
|------------------|-------------|-------------|
| RIA, >20%        | 91.2        | 8.8         |
| RIA, <2%         | 38.8        | 61.2        |

8  
9 **Table S8C (Figure 6C)**

| ABbA binding (%) | Specialists |
|------------------|-------------|
| RIA, >20%        | 37.5        |
| RIA, <2%         | 80.6        |

10  
11
